# Supplementary material for: Effect of plane of nutrition in early life on the transcriptome of visceral adipose tissue in Angus heifer calves
Source: PubMed Central journal article supplement (PMC8102595; doi:10.1038/s41598-021-89252-x), 2021-05-06
Supplement: 41598_2021_89252_MOESM1_ESM.pdf [file 41598_2021_89252_MOESM1_ESM.pdf]

## Supplementary information

### Effect of plane of nutrition in early life on the transcriptome of visceral adipose tissue in Angus heifer calves

**Authors: Kate Keogh<sup>1</sup>, Alan K. Kelly<sup>2</sup> and David A. Kenny<sup>1,2\*</sup>.**

<sup>1</sup>Teagasc Animal & Bioscience Research Department, Teagasc Grange, Dunsany, Co Meath, Ireland.

<sup>2</sup>School of Agriculture and Food Science, University College Dublin, Belfield, Dublin 4, Ireland.

\*Corresponding Author: Prof. David Kenny;

email: [david.kenny@teagasc.ie](mailto:david.kenny@teagasc.ie)

**Supplementary Table 1:** Genes identified as differentially expressed and mapped in Ingenuity Pathway Analysis (IPA) in visceral adipose of heifer calves offered either a High plane of nutrition or a Moderate plane of nutrition for the first 21 weeks of life.

| Symbol <sup>1</sup>    | Entrez Gene Name                                                  | Fold Change <sup>2</sup> | q-value     |
|------------------------|-------------------------------------------------------------------|--------------------------|-------------|
| <i>2410002F23Rik</i>   | RIKEN cDNA 2410002F23 gene                                        | -1.518                   | 0.0227      |
| <b><i>ABAT</i></b>     | 4-aminobutyrate aminotransferase                                  | 2.063                    | 0.0104      |
| <b><i>ABCA7</i></b>    | ATP binding cassette subfamily A member 7                         | 3.14                     | 3.5E-16     |
| <i>ABCB6</i>           | ATP binding cassette subfamily B member 6 (Langereis blood group) | 1.641                    | 0.00245     |
| <i>ABCC8</i>           | ATP binding cassette subfamily C member 8                         | 2.23                     | 0.000281    |
| <b><i>ABCD1</i></b>    | ATP binding cassette subfamily D member 1                         | 1.756                    | 0.000199    |
| <i>ABHD12</i>          | Abhydrolase domain containing 12                                  | 1.551                    | 0.00742     |
| <b><i>ACADS</i></b>    | Acyl-CoA dehydrogenase short chain                                | 1.909                    | 0.000404    |
| <b><i>ACADSB</i></b>   | Acyl-CoA dehydrogenase short/branched chain                       | 1.647                    | 0.00687     |
| <i>ACAT2</i>           | Acetyl-CoA acetyltransferase 2                                    | 2.149                    | 0.000933    |
| <i>ACBD4</i>           | Acyl-CoA binding domain containing 4                              | 1.767                    | 0.0249      |
| <i>ACE2</i>            | Angiotensin I converting enzyme 2                                 | 2.862                    | 0.0000325   |
| <i>ACKR3</i>           | Atypical chemokine receptor 3                                     | 1.625                    | 0.00255     |
| <b><i>ACLY</i></b>     | ATP citrate lyase                                                 | 4.067                    | 0.000000536 |
| <i>Acot6</i>           | Acyl-CoA thioesterase 6                                           | 2.521                    | 0.00281     |
| <i>ACOX1</i>           | Acyl-CoA oxidase 1                                                | 1.547                    | 0.0423      |
| <b><i>ACOX2</i></b>    | Acyl-CoA oxidase 2                                                | 1.811                    | 0.0458      |
| <b><i>ACSBG1</i></b>   | Acyl-CoA synthetase bubblegum family member 1                     | 1.645                    | 0.000511    |
| <i>ACSF2</i>           | Acyl-CoA synthetase family member 2                               | 1.628                    | 0.0264      |
| <i>ACSM2A</i>          | Acyl-CoA synthetase medium chain family member 2A                 | -2.585                   | 0.0499      |
| <i>ACSM3</i>           | Acyl-CoA synthetase medium chain family member 3                  | 6.262                    | 0.00888     |
| <b><i>ACSS2</i></b>    | Acyl-CoA synthetase short chain family member 2                   | 3.041                    | 0.00000598  |
| <i>ACYP2</i>           | Acylphosphatase 2                                                 | 1.955                    | 0.0000206   |
| <i>ADAM11</i>          | ADAM metallopeptidase domain 11                                   | -2.454                   | 0.00634     |
| <i>ADAM19</i>          | ADAM metallopeptidase domain 19                                   | 1.584                    | 0.0011      |
| <b><i>ADAM9</i></b>    | ADAM metallopeptidase domain 9                                    | 1.605                    | 0.0205      |
| <b><i>ADAMTS16</i></b> | ADAM metallopeptidase with thrombospondin type 1 motif 16         | 2.708                    | 0.00146     |
| <i>ADAMTS17</i>        | ADAM metallopeptidase with thrombospondin type 1 motif 17         | 2.222                    | 0.0000048   |
| <i>ADAMTS2</i>         | ADAM metallopeptidase with thrombospondin type 1 motif 2          | 1.529                    | 0.000777    |
| <i>ADH6</i>            | Alcohol dehydrogenase 6 (class V)                                 | 3.083                    | 0.00000329  |
| <b><i>ADHFE1</i></b>   | Alcohol dehydrogenase, iron containing 1                          | 2.463                    | 0.00000285  |

|                 |                                                          |        |             |
|-----------------|----------------------------------------------------------|--------|-------------|
| <i>ADTRP</i>    | Androgen dependent TFPI regulating protein               | 1.516  | 0.0256      |
| <i>AES</i>      | Amino-terminal enhancer of split                         | -1.561 | 0.0011      |
| <i>AGPAT2</i>   | 1-acylglycerol-3-phosphate O-acyltransferase 2           | 1.652  | 0.0139      |
| <i>AIFM3</i>    | Apoptosis inducing factor, mitochondria associated 3     | -2.592 | 0.000236    |
| <i>AK2</i>      | Adenylate kinase 2                                       | -1.513 | 0.0124      |
| <i>AK5</i>      | Adenylate kinase 5                                       | -1.832 | 0.0195      |
| <i>AKAP12</i>   | A-kinase anchoring protein 12                            | 1.668  | 0.00731     |
| <i>AKAP4</i>    | A-kinase anchoring protein 4                             | -4.814 | 0.000337    |
| <i>AKRIC3</i>   | Aldo-keto reductase family 1 member C3                   | -2.092 | 0.00144     |
| <i>AKR7A2</i>   | Aldo-keto reductase family 7 member A2                   | 1.748  | 0.00503     |
| <i>AKT1</i>     | AKT serine/threonine kinase 1                            | -1.515 | 0.000398    |
| <i>ALDH18A1</i> | Aldehyde dehydrogenase 18 family member A1               | 1.532  | 0.043       |
| <i>ALDH2</i>    | Aldehyde dehydrogenase 2 family member                   | 1.635  | 0.00017     |
| <i>ALDH4A1</i>  | Aldehyde dehydrogenase 4 family member A1                | 1.747  | 0.000333    |
| <i>ALDOA</i>    | Aldolase, fructose-bisphosphate A                        | 1.755  | 0.00139     |
| <i>ALDOC</i>    | Aldolase, fructose-bisphosphate C                        | 2.548  | 0.000000551 |
| <i>AMIGO3</i>   | Adhesion molecule with Ig like domain 3                  | -1.607 | 0.014       |
| <i>ANGPT2</i>   | Angiopietin 2                                            | -1.806 | 0.0042      |
| <i>ANGPTL8</i>  | Angiopietin like 8                                       | 7.831  | 0.000032    |
| <i>ANKRD35</i>  | Ankyrin repeat domain 35                                 | 2.796  | 2.02E-08    |
| <i>ANKRD6</i>   | Ankyrin repeat domain 6                                  | -1.816 | 0.00066     |
| <i>ANP32A</i>   | Acidic nuclear phosphoprotein 32 family member A         | -1.501 | 0.02        |
| <i>ANP32B</i>   | Acidic nuclear phosphoprotein 32 family member B         | -1.501 | 0.00981     |
| <i>AOC2</i>     | Amine oxidase, copper containing 2                       | 1.796  | 0.0002      |
| <i>AP3B2</i>    | Adaptor related protein complex 3 subunit beta 2         | -5.342 | 2.53E-12    |
| <i>APCDD1</i>   | APC down-regulated 1                                     | -4.299 | 0.000000611 |
| <i>APOBEC2</i>  | Apolipoprotein B mRNA editing enzyme catalytic subunit 2 | 1.693  | 0.0105      |
| <i>APOL2</i>    | Apolipoprotein L2                                        | 2.031  | 0.00182     |
| <i>AQP3</i>     | Aquaporin 3 (Gill blood group)                           | -2.219 | 0.001       |
| <i>ARHGAP22</i> | Rho GTPase activating protein 22                         | 1.929  | 0.00127     |
| <i>ARHGEF19</i> | Rho guanine nucleotide exchange factor 19                | 1.779  | 0.00688     |
| <i>ARHGEF37</i> | Rho guanine nucleotide exchange factor 37                | 1.78   | 0.00581     |
| <i>ARID3A</i>   | AT-rich interaction domain 3A                            | -2.183 | 0.0000193   |
| <i>ARMC12</i>   | Armadillo repeat containing 12                           | -2.181 | 0.00944     |
| <i>ARNTL</i>    | Aryl hydrocarbon receptor nuclear translocator like      | 1.586  | 0.0172      |

|                       |                                                                  |        |             |
|-----------------------|------------------------------------------------------------------|--------|-------------|
| <i>ARRDC2</i>         | Arrestin domain containing 2                                     | -1.775 | 0.0131      |
| <i>ASB16</i>          | Ankyrin repeat and SOCS box containing 16                        | -2.13  | 0.00066     |
| <i>ASB2</i>           | Ankyrin repeat and SOCS box containing 2                         | 4.316  | 5.19E-16    |
| <i>ASB9</i>           | Ankyrin repeat and SOCS box containing 9                         | 1.825  | 0.00742     |
| <i>ASGR1</i>          | Asialoglycoprotein receptor 1                                    | -2.537 | 0.0000192   |
| <i>ASGR2</i>          | Asialoglycoprotein receptor 2                                    | 1.711  | 0.0345      |
| <i>ASL</i>            | Argininosuccinate lyase                                          | -1.817 | 0.0000472   |
| <i>ASMTL</i>          | Acetylserotonin O-methyltransferase like                         | 1.583  | 0.0217      |
| <i>ASS1</i>           | Argininosuccinate synthase 1                                     | -1.722 | 0.00139     |
| <i>ASZ1</i>           | Ankyrin repeat, SAM and basic leucine zipper domain containing 1 | 2.177  | 0.00938     |
| <i>ATL2</i>           | Atlantin GTPase 2                                                | 2.022  | 0.00212     |
| <i>ATOX1</i>          | Antioxidant 1 copper chaperone                                   | 1.953  | 0.000915    |
| <i>ATP10A</i>         | ATPase phospholipid transporting 10A (putative)                  | -1.768 | 0.00435     |
| <i>ATP13A4</i>        | ATPase 13A4                                                      | -2.406 | 0.00105     |
| <i>ATP2B2</i>         | ATPase plasma membrane Ca <sup>2+</sup> transporting 2           | 1.943  | 0.00413     |
| <i>ATP5MF</i>         | ATP synthase membrane subunit f                                  | 1.884  | 0.0114      |
| <i>ATP6V1E1</i>       | ATPase H <sup>+</sup> transporting V1 subunit E1                 | 1.714  | 0.000404    |
| <i>ATRNL1</i>         | Attractin like 1                                                 | 1.763  | 0.0164      |
| <i>AVP11</i>          | Arginine vasopressin induced 1                                   | -2.425 | 0.000644    |
| <i>B3GAT1</i>         | Beta-1,3-glucuronyltransferase 1                                 | -2.034 | 0.000573    |
| <i>BAIAP2L1</i>       | BAI1 associated protein 2 like 1                                 | 2.657  | 0.0000016   |
| <i>BANP</i>           | BTG3 associated nuclear protein                                  | -1.703 | 0.00000285  |
| <i>BCAP31</i>         | B cell receptor associated protein 31                            | 1.739  | 0.00128     |
| <i>BCL6</i>           | B cell CLL/lymphoma 6                                            | 2.501  | 0.000000115 |
| <b><i>BDH1</i></b>    | 3-hydroxybutyrate dehydrogenase 1                                | 6.348  | 0.0000375   |
| <i>BICD1</i>          | BICD cargo adaptor 1                                             | 2.082  | 0.000903    |
| <i>BIN3</i>           | Bridging integrator 3                                            | -1.753 | 0.000199    |
| <i>BMPER</i>          | BMP binding endothelial regulator                                | 2.876  | 0.000557    |
| <i>BNIP3</i>          | BCL2 interacting protein 3                                       | -2.019 | 0.000903    |
| <b><i>BOLA3</i></b>   | BolA family member 3                                             | 2.274  | 0.00462     |
| <i>BPHL</i>           | Biphenyl hydrolase like                                          | 1.615  | 0.000607    |
| <i>BUD23</i>          | BUD23, rRNA methyltransferase and ribosome maturation factor     | 1.598  | 0.0328      |
| <b><i>C1QTNF2</i></b> | C1q and TNF related 2                                            | 1.691  | 0.00734     |
| <i>C2</i>             | Complement C2                                                    | -1.902 | 0.00209     |
| <i>C2CD2</i>          | C2 calcium dependent domain containing 2                         | -1.607 | 0.0128      |

|                       |                                                  |        |             |
|-----------------------|--------------------------------------------------|--------|-------------|
| <i>C3orf18</i>        | Chromosome 3 open reading frame 18               | 1.769  | 0.00176     |
| <i>C9orf50</i>        | Chromosome 9 open reading frame 50               | 1.824  | 0.0155      |
| <i>CA10</i>           | Carbonic anhydrase 10                            | 2.452  | 0.0103      |
| <i>CA11</i>           | Carbonic anhydrase 11                            | 2.859  | 0.000188    |
| <i>CA4</i>            | Carbonic anhydrase 4                             | -1.511 | 0.0499      |
| <i>CABCOCO1</i>       | Ciliary associated calcium binding coiled-coil 1 | -2.702 | 0.0000298   |
| <b><i>CACNA1G</i></b> | Calcium voltage-gated channel subunit alpha1 G   | 1.581  | 0.00834     |
| <i>CALR3</i>          | Calreticulin 3                                   | 2.278  | 0.0153      |
| <i>CAMK1G</i>         | Calcium/calmodulin dependent protein kinase IG   | -5.403 | 0.0000207   |
| <i>CAMP</i>           | Cathelicidin antimicrobial peptide               | 5.91   | 0.037       |
| <i>CAPN3</i>          | Calpain 3                                        | 2.408  | 0.000337    |
| <i>CAST</i>           | Calpastatin                                      | -1.505 | 0.00335     |
| <i>CCDC112</i>        | Coiled-coil domain containing 112                | -1.566 | 0.0071      |
| <i>CCDC115</i>        | Coiled-coil domain containing 115                | 1.554  | 0.00887     |
| <i>CCDC3</i>          | Coiled-coil domain containing 3                  | 3.53   | 2.95E-09    |
| <b><i>CCDC69</i></b>  | Coiled-coil domain containing 69                 | 1.831  | 0.00496     |
| <i>CCDC8</i>          | Coiled-coil domain containing 8                  | -1.596 | 0.00163     |
| <i>CCDC85C</i>        | Coiled-coil domain containing 85C                | 2.296  | 0.000000783 |
| <i>CCDC92</i>         | Coiled-coil domain containing 92                 | 1.562  | 0.00371     |
| <i>CCND2</i>          | Cyclin D2                                        | -1.956 | 0.000167    |
| <b><i>CCNG2</i></b>   | Cyclin G2                                        | 2.017  | 7.88E-09    |
| <i>CD1A</i>           | CD1a molecule                                    | 1.897  | 0.00097     |
| <i>CD81</i>           | CD81 molecule                                    | 1.5    | 0.0227      |
| <i>CDC25A</i>         | Cell division cycle 25A                          | 1.63   | 0.0499      |
| <i>CDC34</i>          | Cell division cycle 34                           | 1.876  | 0.00293     |
| <i>CDC42EP4</i>       | CDC42 effector protein 4                         | -1.636 | 0.00232     |
| <i>CDK18</i>          | Cyclin dependent kinase 18                       | -1.73  | 1.54E-08    |
| <i>CDS1</i>           | CDP-diacylglycerol synthase 1                    | 2.482  | 0.0114      |
| <i>CENPX</i>          | Centromere protein X                             | 1.656  | 0.017       |
| <i>CEP89</i>          | Centrosomal protein 89                           | -1.538 | 0.00139     |
| <i>CERS6</i>          | Ceramide synthase 6                              | 1.807  | 0.00921     |
| <i>CFI</i>            | Complement factor I                              | 1.59   | 0.0358      |
| <i>CGNL1</i>          | Cingulin like 1                                  | 1.875  | 0.00487     |
| <b><i>CGREF1</i></b>  | Cell growth regulator with EF-hand domain 1      | 1.577  | 0.0154      |
| <i>CHAC2</i>          | ChaC cation transport regulator homolog 2        | 1.637  | 0.0038      |

|                |                                                   |         |             |
|----------------|---------------------------------------------------|---------|-------------|
| <b>CHAF1A</b>  | Chromatin assembly factor 1 subunit A             | 2.24    | 0.00000216  |
| <b>CHI3L1</b>  | Chitinase 3 like 1                                | 2.373   | 0.0000213   |
| <b>CHPT1</b>   | Choline phosphotransferase 1                      | 1.663   | 0.000173    |
| <b>CHRNA3</b>  | Cholinergic receptor nicotinic alpha 3 subunit    | -2.207  | 0.00458     |
| <b>CIB4</b>    | Calcium and integrin binding family member 4      | -1.761  | 0.0387      |
| <b>CILP2</b>   | Cartilage intermediate layer protein 2            | -1.501  | 0.0341      |
| <b>CIRBP</b>   | Cold inducible RNA binding protein                | -1.641  | 0.00208     |
| <b>CISD1</b>   | CDGSH iron sulfur domain 1                        | 2.305   | 0.000156    |
| <b>CISH</b>    | Cytokine inducible SH2 containing protein         | -2.019  | 0.00472     |
| <b>CKB</b>     | Creatine kinase B                                 | 4.6     | 0.00000187  |
| <b>CLCF1</b>   | Cardiotrophin like cytokine factor 1              | -1.815  | 0.000398    |
| <b>CLCN4</b>   | Chloride voltage-gated channel 4                  | 2.039   | 0.00503     |
| <i>Clec2g</i>  | C-type lectin domain family 2, member G           | -2.95   | 1.82E-24    |
| <b>CLGN</b>    | Calmegin                                          | 1.866   | 0.0141      |
| <b>CLIC6</b>   | Chloride intracellular channel 6                  | -2.715  | 0.00896     |
| <b>CLMN</b>    | Calmin                                            | -1.609  | 0.0013      |
| <b>CLU</b>     | Clusterin                                         | 3.24    | 1.46E-08    |
| <b>CMC2</b>    | C-X9-C motif containing 2                         | 2.247   | 0.000337    |
| <b>CNKSR3</b>  | CNKSR family member 3                             | -1.502  | 0.0334      |
| <b>CNTN1</b>   | Contactin 1                                       | 1.531   | 0.0122      |
| <b>COA3</b>    | Cytochrome c oxidase assembly factor 3            | 1.857   | 0.00148     |
| <b>COA7</b>    | Cytochrome c oxidase assembly factor 7 (putative) | 1.932   | 0.000288    |
| <b>COL11A2</b> | Collagen type XI alpha 2 chain                    | -2.17   | 0.000333    |
| <b>COL1A1</b>  | Collagen type I alpha 1 chain                     | 1.508   | 0.025       |
| <b>COL1A2</b>  | Collagen type I alpha 2 chain                     | 1.662   | 0.00412     |
| <b>COL20A1</b> | Collagen type XX alpha 1 chain                    | -3.604  | 0.000599    |
| <b>COL22A1</b> | Collagen type XXII alpha 1 chain                  | -6.502  | 0.00000224  |
| <b>COL5A3</b>  | Collagen type V alpha 3 chain                     | 1.825   | 0.00000637  |
| <b>COPS9</b>   | COP9 signalosome subunit 9                        | 1.549   | 0.0381      |
| <b>COQ9</b>    | Coenzyme Q9                                       | 1.543   | 0.0227      |
| <b>CORIN</b>   | Corin, serine peptidase                           | -10.078 | 9.97E-13    |
| <b>CORO2A</b>  | Coronin 2A                                        | -2.611  | 0.000000684 |
| <b>COX20</b>   | Cytochrome c oxidase assembly factor COX20        | 1.658   | 0.0477      |
| <b>COX4I2</b>  | Cytochrome c oxidase subunit 4I2                  | 1.753   | 0.0205      |
| <b>Cox6c</b>   | Cytochrome c oxidase subunit 6C                   | 1.967   | 0.00623     |

|                |                                                            |        |            |
|----------------|------------------------------------------------------------|--------|------------|
| <i>COX7A1</i>  | Cytochrome c oxidase subunit 7A1                           | 2.512  | 0.00139    |
| <i>COX7B</i>   | Cytochrome c oxidase subunit 7B                            | 1.627  | 0.0251     |
| <i>CPAMD8</i>  | C3 and PZP like, alpha-2-macroglobulin domain containing 8 | -1.774 | 0.0114     |
| <i>CPE</i>     | Carboxypeptidase E                                         | 1.719  | 0.0349     |
| <i>CPNE2</i>   | Copine 2                                                   | -1.628 | 0.000778   |
| <i>CPT2</i>    | Carnitine palmitoyltransferase 2                           | 1.662  | 0.00192    |
| <i>CPXM1</i>   | Carboxypeptidase X, M14 family member 1                    | 1.679  | 0.000238   |
| <i>CPZ</i>     | Carboxypeptidase Z                                         | 2.177  | 0.00435    |
| <i>CRABP2</i>  | Cellular retinoic acid binding protein 2                   | 1.848  | 0.0476     |
| <i>CRAT</i>    | Carnitine O-acetyltransferase                              | 1.777  | 0.00813    |
| <i>CRB1</i>    | Crumbs 1, cell polarity complex component                  | 1.883  | 0.00906    |
| <i>CRYAB</i>   | Crystallin alpha B                                         | 2.75   | 0.00188    |
| <i>CRYZ</i>    | Crystallin zeta                                            | 2.053  | 0.00000774 |
| <i>CSDC2</i>   | Cold shock domain containing C2                            | 2.278  | 0.0019     |
| <i>CSPG4</i>   | Chondroitin sulfate proteoglycan 4                         | -1.546 | 0.00301    |
| <i>CSRNP1</i>  | Cysteine and serine rich nuclear protein 1                 | -1.533 | 0.00694    |
| <i>CTSD</i>    | Cathepsin D                                                | 1.669  | 0.00051    |
| <i>CTSO</i>    | Cathepsin O                                                | -1.638 | 0.0132     |
| <i>CX3CL1</i>  | C-X3-C motif chemokine ligand 1                            | 1.575  | 0.00728    |
| <i>CX3CR1</i>  | C-X3-C motif chemokine receptor 1                          | 1.577  | 0.0447     |
| <i>CXCL2</i>   | C-X-C motif chemokine ligand 2                             | -2.215 | 0.00621    |
| <i>CYB5A</i>   | Cytochrome b5 type A                                       | 1.927  | 0.000183   |
| <i>CYP4V2</i>  | Cytochrome P450 family 4 subfamily V member 2              | -2.562 | 0.0000346  |
| <i>DAPK3</i>   | Death associated protein kinase 3                          | -1.655 | 0.00196    |
| <i>DBI</i>     | Diazepam binding inhibitor, acyl-CoA binding protein       | 1.855  | 0.0195     |
| <i>DBP</i>     | D-box binding PAR bZIP transcription factor                | -1.57  | 0.0363     |
| <i>DCDC2B</i>  | Doublecortin domain containing 2B                          | -1.717 | 0.00748    |
| <i>DCLRE1B</i> | DNA cross-link repair 1B                                   | 1.969  | 0.0406     |
| <i>DDAH2</i>   | Dimethylarginine dimethylaminohydrolase 2                  | -2.12  | 0.00277    |
| <i>DDHD2</i>   | DDHD domain containing 2                                   | 1.614  | 0.000282   |
| <i>DDIT4</i>   | DNA damage inducible transcript 4                          | -2.401 | 0.000224   |
| <i>DECRI</i>   | 2,4-dienoyl-CoA reductase 1                                | 2.355  | 0.000228   |
| <i>DENND2D</i> | DENN domain containing 2D                                  | -2.121 | 0.00000275 |
| <i>DEPP1</i>   | DEPP1, autophagy regulator                                 | -3.286 | 0.000165   |
| <i>DGAT2</i>   | Diacylglycerol O-acyltransferase 2                         | 1.802  | 0.0459     |

|                |                                                          |        |            |
|----------------|----------------------------------------------------------|--------|------------|
| <b>DHCR24</b>  | 24-dehydrocholesterol reductase                          | 2.014  | 0.00851    |
| <b>DHRS3</b>   | Dehydrogenase/reductase 3                                | 1.714  | 0.0000145  |
| <b>DKK3</b>    | Dickkopf WNT signaling pathway inhibitor 3               | -1.647 | 0.0342     |
| <b>DLX5</b>    | Distal-less homeobox 5                                   | 1.763  | 0.0175     |
| <b>DMPK</b>    | DM1 protein kinase                                       | 2.637  | 0.000569   |
| <b>DMTN</b>    | Dematin actin binding protein                            | -2.699 | 0.0000594  |
| <b>DNAJB5</b>  | DnaJ heat shock protein family (Hsp40) member B5         | 1.623  | 0.0223     |
| <b>DNAJC12</b> | DnaJ heat shock protein family (Hsp40) member C12        | 1.742  | 0.0098     |
| <b>DNAJC24</b> | DnaJ heat shock protein family (Hsp40) member C24        | 1.529  | 0.00914    |
| <b>DNAJC6</b>  | DnaJ heat shock protein family (Hsp40) member C6         | -2.064 | 0.000777   |
| <b>DNAL4</b>   | Dynein axonemal light chain 4                            | -1.508 | 0.0388     |
| <b>DNHD1</b>   | Dynein heavy chain domain 1                              | -1.745 | 0.00821    |
| <b>DOCK8</b>   | Dedicator of cytokinesis 8                               | -2.247 | 0.0000634  |
| <b>DPYSL3</b>  | Dihydropyrimidinase like 3                               | -2.193 | 0.000332   |
| <b>DQX1</b>    | DEAQ-box RNA dependent ATPase 1                          | -1.711 | 0.000753   |
| <b>DUSP10</b>  | Dual specificity phosphatase 10                          | 3.057  | 1.05E-18   |
| <b>DUSP22</b>  | Dual specificity phosphatase 22                          | -1.769 | 0.0000173  |
| <b>DUSP26</b>  | Dual specificity phosphatase 26                          | -6.226 | 0.0000089  |
| <b>DUSP4</b>   | Dual specificity phosphatase 4                           | -2.386 | 0.011      |
| <b>DYNLRB2</b> | Dynein light chain roadblock-type 2                      | -2.505 | 0.0141     |
| <b>ECH1</b>    | Enoyl-CoA hydratase 1                                    | 1.556  | 0.00677    |
| <b>ECHDC2</b>  | Enoyl-CoA hydratase domain containing 2                  | 1.91   | 0.00000175 |
| <b>ECHS1</b>   | Enoyl-CoA hydratase, short chain 1                       | 1.723  | 0.00504    |
| <b>EEF2K</b>   | Eukaryotic elongation factor 2 kinase                    | -1.689 | 0.00326    |
| <b>EFS</b>     | Embryonal Fyn-associated substrate                       | -1.771 | 1.62E-08   |
| <b>EHBP1</b>   | EH domain binding protein 1                              | -1.652 | 0.00688    |
| <b>EIF2B2</b>  | Eukaryotic translation initiation factor 2B subunit beta | 1.516  | 0.00853    |
| <b>EIF4G1</b>  | Eukaryotic translation initiation factor 4 gamma 1       | 1.529  | 0.00308    |
| <b>ELL3</b>    | Elongation factor for RNA polymerase II 3                | -1.606 | 0.0235     |
| <b>ELOVL1</b>  | ELOVL fatty acid elongase 1                              | -1.501 | 0.00066    |
| <b>ELOVL5</b>  | ELOVL fatty acid elongase 5                              | 1.938  | 0.00947    |
| <b>ELP6</b>    | Elongator acetyltransferase complex subunit 6            | 1.755  | 0.00267    |
| <b>EMILIN2</b> | Elastin microfibril interfacer 2                         | -1.681 | 0.0167     |
| <b>ENO4</b>    | Enolase 4                                                | -1.754 | 0.0182     |
| <b>ENPEP</b>   | Glutamyl aminopeptidase                                  | 2.224  | 0.0000321  |



|                 |                                                                        |        |            |
|-----------------|------------------------------------------------------------------------|--------|------------|
| <i>ENTPD2</i>   | Ectonucleoside triphosphate diphosphohydrolase 2                       | 1.843  | 0.00136    |
| <i>EPB41L4B</i> | Erythrocyte membrane protein band 4.1 like 4B                          | -1.76  | 0.0287     |
| <i>EPDR1</i>    | Ependymin related 1                                                    | 1.782  | 0.0083     |
| <i>EPHX2</i>    | Epoxide hydrolase 2                                                    | 1.985  | 0.00000182 |
| <i>EPM2A</i>    | EPM2A, laforin glucan phosphatase                                      | 1.614  | 0.0147     |
| <i>ERBB2</i>    | Erb-b2 receptor tyrosine kinase 2                                      | -1.933 | 0.0000355  |
| <i>ESR1</i>     | Estrogen receptor 1                                                    | 2.199  | 0.0109     |
| <i>ETFA</i>     | Electron transfer flavoprotein subunit alpha                           | 2.022  | 0.00162    |
| <i>ETFDH</i>    | Electron transfer flavoprotein dehydrogenase                           | 1.603  | 0.0151     |
| <i>ETV5</i>     | ETS variant 5                                                          | -1.536 | 0.0442     |
| <i>F13A1</i>    | Coagulation factor XIII A chain                                        | 1.517  | 0.0257     |
| <i>FAAP100</i>  | FA core complex associated protein 100                                 | -1.608 | 0.00103    |
| <i>FAM155B</i>  | Family with sequence similarity 155 member B                           | 2.054  | 0.00941    |
| <i>FAM19A5</i>  | Family with sequence similarity 19 member A5, C-C motif chemokine like | -2.028 | 0.00326    |
| <i>FAM210B</i>  | Family with sequence similarity 210 member B                           | -2.162 | 0.00401    |
| <i>FAM221B</i>  | Family with sequence similarity 221 member B                           | -2.639 | 0.000075   |
| <i>FAM84A</i>   | Family with sequence similarity 84 member A                            | 1.939  | 0.000535   |
| <i>FANCD2</i>   | FA complementation group D2                                            | 2.021  | 0.00182    |
| <i>FAP</i>      | Fibroblast activation protein alpha                                    | 1.649  | 0.0152     |
| <i>FASN</i>     | Fatty acid synthase                                                    | 2.711  | 0.0159     |
| <i>FAT1</i>     | FAT atypical cadherin 1                                                | -1.77  | 0.00479    |
| <i>FBP1</i>     | Fructose-bisphosphatase 1                                              | -2.565 | 2.84E-11   |
| <i>FBXO17</i>   | F-box protein 17                                                       | -2.121 | 0.0000168  |
| <i>FBXO4</i>    | F-box protein 4                                                        | -1.588 | 0.000572   |
| <i>FBXO40</i>   | F-box protein 40                                                       | 1.951  | 0.00106    |
| <i>FCN1</i>     | Ficolin 1                                                              | -2.04  | 0.000699   |
| <i>FFAR4</i>    | Free fatty acid receptor 4                                             | 2.175  | 0.000422   |
| <i>FGF1</i>     | Fibroblast growth factor 1                                             | 5.182  | 4.83E-15   |
| <i>FGFR3</i>    | Fibroblast growth factor receptor 3                                    | -2.088 | 0.00267    |
| <i>FGL1</i>     | Fibrinogen like 1                                                      | 1.704  | 0.0158     |
| <i>FH</i>       | Fumarate hydratase                                                     | 1.632  | 0.00418    |
| <i>FHL1</i>     | Four and a half LIM domains 1                                          | -3.535 | 1.77E-13   |
| <i>FKBP11</i>   | FK506 binding protein 11                                               | -1.965 | 0.000182   |
| <i>FKRP</i>     | Fukutin related protein                                                | -1.539 | 0.000231   |
| <i>FN3K</i>     | Fructosamine 3 kinase                                                  | 1.738  | 0.0182     |

|                |                                                     |        |             |
|----------------|-----------------------------------------------------|--------|-------------|
| <i>FNDC10</i>  | Fibronectin type III domain containing 10           | 1.767  | 0.000175    |
| <i>FNTB</i>    | Farnesyltransferase, CAAX box, beta                 | 1.659  | 0.000364    |
| <i>Folh1</i>   | Folate hydrolase 1                                  | 2.638  | 3.31E-08    |
| <i>FOXP3</i>   | Forkhead box P3                                     | 1.839  | 0.00725     |
| <i>FOXRED1</i> | FAD dependent oxidoreductase domain containing 1    | 1.625  | 0.00497     |
| <i>FPGS</i>    | Folylpolyglutamate synthase                         | -1.651 | 0.0000168   |
| <i>FUNDC2</i>  | FUN14 domain containing 2                           | 1.596  | 0.000337    |
| <i>FUT1</i>    | Fucosyltransferase 1 (H blood group)                | -1.75  | 0.000607    |
| <i>FXYP7</i>   | FXYP domain containing ion transport regulator 7    | -1.806 | 0.0482      |
| <i>G0S2</i>    | G0/G1 switch 2                                      | -2.304 | 0.00152     |
| <b>G6PD</b>    | Glucose-6-phosphate dehydrogenase                   | 2.684  | 0.000000119 |
| <b>GALNT15</b> | Polypeptide N-acetylgalactosaminyltransferase 15    | -2.03  | 0.0264      |
| <i>GALNT16</i> | Polypeptide N-acetylgalactosaminyltransferase 16    | 1.693  | 0.0000275   |
| <i>GAMT</i>    | Guanidinoacetate N-methyltransferase                | 1.587  | 0.0159      |
| <i>GAS2L2</i>  | Growth arrest specific 2 like 2                     | -2.465 | 0.0000652   |
| <i>GATM</i>    | Glycine amidinotransferase                          | -1.529 | 0.0273      |
| <i>GJC2</i>    | Gap junction protein gamma 2                        | 1.75   | 0.00119     |
| <i>GK</i>      | Glycerol kinase                                     | 1.816  | 0.00274     |
| <i>GLRX5</i>   | Glutaredoxin 5                                      | 1.828  | 0.00596     |
| <i>GLT8D2</i>  | Glycosyltransferase 8 domain containing 2           | 1.533  | 0.000893    |
| <b>GLYAT</b>   | Glycine-N-acyltransferase                           | 2.449  | 0.000736    |
| <i>GM2A</i>    | GM2 ganglioside activator                           | 2.098  | 0.0000161   |
| <i>Gm4952</i>  | Predicted gene 4952                                 | 2.107  | 0.00114     |
| <i>GMEB2</i>   | Glucocorticoid modulatory element binding protein 2 | -1.515 | 0.00136     |
| <i>GMPPB</i>   | GDP-mannose pyrophosphorylase B                     | -1.566 | 0.00519     |
| <i>GOT2</i>    | Glutamic-oxaloacetic transaminase 2                 | 1.634  | 0.0182      |
| <b>GPAM</b>    | Glycerol-3-phosphate acyltransferase, mitochondrial | 1.645  | 0.00496     |
| <i>GPC1</i>    | Glypican 1                                          | 1.616  | 0.0122      |
| <i>GPERR1</i>  | G protein-coupled estrogen receptor 1               | 1.889  | 0.000357    |
| <i>GPI</i>     | Glucose-6-phosphate isomerase                       | 1.969  | 0.0000318   |
| <i>Gpm6b</i>   | Glycoprotein m6b                                    | 1.613  | 0.0231      |
| <i>GPR156</i>  | G protein-coupled receptor 156                      | -1.838 | 0.00996     |
| <i>GPR21</i>   | G protein-coupled receptor 21                       | 1.668  | 0.000903    |
| <i>GPR37</i>   | G protein-coupled receptor 37                       | 1.843  | 0.0336      |
| <i>GPR37L1</i> | G protein-coupled receptor 37 like 1                | 1.691  | 0.0259      |

|                      |                                                                                    |        |             |
|----------------------|------------------------------------------------------------------------------------|--------|-------------|
| <b><i>GPRC5A</i></b> | G protein-coupled receptor class C group 5 member A                                | -1.91  | 0.0265      |
| <i>GRB7</i>          | Growth factor receptor bound protein 7                                             | -2.055 | 0.0489      |
| <i>GREB1</i>         | Growth regulating estrogen receptor binding 1                                      | 3.379  | 0.000068    |
| <i>GRIK2</i>         | Glutamate ionotropic receptor kainate type subunit 2                               | -2.199 | 0.000253    |
| <i>GSDMB</i>         | Gasdermin B                                                                        | -2.055 | 0.00439     |
| <i>GSDME</i>         | Gasdermin E                                                                        | -4.119 | 0.0000375   |
| <i>GSN</i>           | Gelsolin                                                                           | -1.531 | 0.0175      |
| <b><i>GSS</i></b>    | Glutathione synthetase                                                             | 1.707  | 0.0414      |
| <i>GSTA1</i>         | Glutathione S-transferase alpha 1                                                  | 2.903  | 0.00115     |
| <b><i>GSTA4</i></b>  | Glutathione S-transferase alpha 4                                                  | 1.67   | 0.0045      |
| <i>GSTM4</i>         | Glutathione S-transferase mu 4                                                     | 1.877  | 0.0229      |
| <b><i>Gstt1</i></b>  | Glutathione S-transferase, theta 1                                                 | 2.061  | 0.00302     |
| <b><i>Gstt3</i></b>  | Glutathione S-transferase, theta 3                                                 | 2.273  | 0.0124      |
| <i>GTF2H5</i>        | General transcription factor IIH subunit 5                                         | 1.522  | 0.0214      |
| <i>GUCY2D</i>        | Guanylate cyclase 2D, retinal                                                      | 2.622  | 0.000893    |
| <i>Gulo</i>          | Gulonolactone (L-) oxidase                                                         | 1.685  | 0.0291      |
| <i>GYG2</i>          | Glycogenin 2                                                                       | -1.545 | 0.0018      |
| <i>GYS2</i>          | Glycogen synthase 2                                                                | 2.702  | 0.00686     |
| <i>HABP4</i>         | Hyaluronan binding protein 4                                                       | 1.654  | 0.0141      |
| <b><i>HACD2</i></b>  | 3-hydroxyacyl-CoA dehydratase 2                                                    | 1.648  | 0.00000784  |
| <b><i>HADH</i></b>   | Hydroxyacyl-CoA dehydrogenase                                                      | 1.514  | 0.00261     |
| <i>HAGHL</i>         | Hydroxyacylglutathione hydrolase like                                              | 1.827  | 0.000309    |
| <i>HAS2</i>          | Hyaluronan synthase 2                                                              | -9.507 | 0.000000562 |
| <i>HBD</i>           | Hemoglobin subunit delta                                                           | 4.833  | 0.0147      |
| <i>HCAR3</i>         | Hydroxycarboxylic acid receptor 3                                                  | -1.659 | 0.00115     |
| <i>HCN2</i>          | Hyperpolarization activated cyclic nucleotide gated potassium and sodium channel 2 | 5.313  | 0.000000119 |
| <i>HCRTR1</i>        | Hypocretin receptor 1                                                              | -1.55  | 0.000906    |
| <i>HDC</i>           | Histidine decarboxylase                                                            | 1.951  | 0.0156      |
| <i>HDGFL3</i>        | HDGF like 3                                                                        | -1.957 | 0.000252    |
| <i>HES6</i>          | Hes family bHLH transcription factor 6                                             | -5.31  | 0.0000293   |
| <i>HEY1</i>          | Hes related family bHLH transcription factor with YRPW motif 1                     | -1.85  | 0.000113    |
| <i>HIBADH</i>        | 3-hydroxyisobutyrate dehydrogenase                                                 | 1.509  | 0.000654    |
| <i>HIF1A</i>         | Hypoxia inducible factor 1 subunit alpha                                           | -1.954 | 0.00512     |
| <i>HIF3A</i>         | Hypoxia inducible factor 3 subunit alpha                                           | -2.542 | 0.000228    |
| <i>HIGD1B</i>        | HIG1 hypoxia inducible domain family member 1B                                     | 2.596  | 0.000174    |

|                         |                                                                |        |           |
|-------------------------|----------------------------------------------------------------|--------|-----------|
| <i>HINT3</i>            | Histidine triad nucleotide binding protein 3                   | 1.641  | 0.00503   |
| <i>HIST1H2AC</i>        | Histone cluster 1 H2A family member c                          | 2.637  | 0.0000706 |
| <b><i>HIST1H2BN</i></b> | Histone cluster 1 H2B family member n                          | 1.996  | 0.00139   |
| <i>HIST1H2BO</i>        | Histone cluster 1 H2B family member o                          | 1.516  | 0.000992  |
| <i>HIST1H4J</i>         | Histone cluster 1 H4 family member j                           | -1.762 | 0.0397    |
| <i>HIST2H4A</i>         | Histone cluster 2 H4 family member a                           | 2.362  | 8.65E-09  |
| <i>HLA-DMB</i>          | Major histocompatibility complex, class II, DM beta            | 1.531  | 0.0476    |
| <i>HLCS</i>             | Holocarboxylase synthetase                                     | 1.795  | 0.000871  |
| <i>HMGB2</i>            | High mobility group box 2                                      | -1.914 | 0.00127   |
| <i>HMOX2</i>            | Heme oxygenase 2                                               | 1.518  | 0.0158    |
| <i>HNRNPA1</i>          | Heterogeneous nuclear ribonucleoprotein A1                     | -1.719 | 0.00002   |
| <i>HOMER1</i>           | Homer scaffold protein 1                                       | 2.146  | 0.000281  |
| <i>HOXC5</i>            | Homeobox C5                                                    | 1.805  | 0.00342   |
| <i>HOXC8</i>            | Homeobox C8                                                    | -1.876 | 0.0000652 |
| <i>HPD</i>              | 4-hydroxyphenylpyruvate dioxygenase                            | 3.949  | 0.00182   |
| <i>HSD17B11</i>         | Hydroxysteroid 17-beta dehydrogenase 11                        | -1.56  | 0.0097    |
| <b><i>HSD17B12</i></b>  | Hydroxysteroid 17-beta dehydrogenase 12                        | 1.891  | 0.017     |
| <i>HSD17B14</i>         | Hydroxysteroid 17-beta dehydrogenase 14                        | 2.512  | 0.000209  |
| <i>HSF2BP</i>           | Heat shock transcription factor 2 binding protein              | -1.784 | 0.0038    |
| <i>HSPB6</i>            | Heat shock protein family B (small) member 6                   | 1.625  | 0.0000257 |
| <b><i>IDH3B</i></b>     | Isocitrate dehydrogenase 3 (NAD(+)) beta                       | 1.642  | 0.02      |
| <b><i>IDII</i></b>      | Isopentenyl-diphosphate delta isomerase 1                      | 2.051  | 0.0000813 |
| <b><i>IFIT3</i></b>     | Interferon induced protein with tetratricopeptide repeats 3    | 1.768  | 0.0272    |
| <i>IFT81</i>            | Intraflagellar transport 81                                    | -1.505 | 0.0229    |
| <i>IGDCC4</i>           | Immunoglobulin superfamily DCC subclass member 4               | 1.904  | 0.0229    |
| <i>IGF1</i>             | Insulin like growth factor 1                                   | -1.574 | 0.00693   |
| <i>IGFALS</i>           | Insulin like growth factor binding protein acid labile subunit | -2.524 | 0.0000297 |
| <i>IL1B</i>             | Interleukin 1 beta                                             | 1.631  | 0.0297    |
| <i>IL20RA</i>           | Interleukin 20 receptor subunit alpha                          | -5.039 | 2.82E-12  |
| <i>IL23A</i>            | Interleukin 23 subunit alpha                                   | 1.872  | 0.00011   |
| <i>IL2RA</i>            | Interleukin 2 receptor subunit alpha                           | 2.995  | 3.31E-08  |
| <i>IL6R</i>             | Interleukin 6 receptor                                         | -1.991 | 0.0138    |
| <i>IMPA2</i>            | Inositol monophosphatase 2                                     | -1.683 | 0.00551   |
| <i>INPP5K</i>           | Inositol polyphosphate-5-phosphatase K                         | 2.324  | 5.16E-11  |
| <i>INSR</i>             | Insulin receptor                                               | -1.551 | 0.0351    |

|                 |                                                                           |        |            |
|-----------------|---------------------------------------------------------------------------|--------|------------|
| <i>IPO4</i>     | Importin 4                                                                | -1.803 | 0.000263   |
| <i>IRF8</i>     | Interferon regulatory factor 8                                            | 1.689  | 0.0101     |
| <i>IRS2</i>     | Insulin receptor substrate 2                                              | -1.857 | 0.0158     |
| <i>IRX3</i>     | Iroquois homeobox 3                                                       | -1.59  | 0.0497     |
| <i>ISCU</i>     | Iron-sulfur cluster assembly enzyme                                       | 1.795  | 0.000457   |
| <i>ISOC1</i>    | Isochorismatase domain containing 1                                       | 1.586  | 0.00194    |
| <i>ISOC2</i>    | Isochorismatase domain containing 2                                       | 2.119  | 0.000804   |
| <i>ITGA7</i>    | Integrin subunit alpha 7                                                  | 2.591  | 4.23E-09   |
| <i>ITGAE</i>    | Integrin subunit alpha E                                                  | 1.631  | 0.00167    |
| <i>ITGBL1</i>   | Integrin subunit beta like 1                                              | 1.714  | 0.0259     |
| <i>ITIH3</i>    | Inter-alpha-trypsin inhibitor heavy chain 3                               | -2.834 | 0.000648   |
| <i>ITIH4</i>    | Inter-alpha-trypsin inhibitor heavy chain family member 4                 | -3.013 | 0.0000115  |
| <i>ITM2B</i>    | Integral membrane protein 2B                                              | 1.698  | 0.0000177  |
| <i>ITM2C</i>    | Integral membrane protein 2C                                              | -1.528 | 0.0148     |
| <i>ITPKC</i>    | Inositol-trisphosphate 3-kinase C                                         | -1.76  | 0.00124    |
| <i>IVD</i>      | Isovaleryl-CoA dehydrogenase                                              | 1.549  | 0.00537    |
| <i>IVNS1ABP</i> | Influenza virus NS1A binding protein                                      | -1.664 | 0.00198    |
| <i>KALRN</i>    | Kalirin RhoGEF kinase                                                     | -1.726 | 0.0011     |
| <i>KAZN</i>     | Kazrin, periplakin interacting protein                                    | 2.078  | 0.00058    |
| <i>KCNC3</i>    | Potassium voltage-gated channel subfamily C member 3                      | 3.771  | 0.0000821  |
| <i>KCNC4</i>    | Potassium voltage-gated channel subfamily C member 4                      | -1.719 | 0.0104     |
| <i>KCNH3</i>    | Potassium voltage-gated channel subfamily H member 3                      | -3.782 | 0.0000465  |
| <i>KCNJ11</i>   | Potassium voltage-gated channel subfamily J member 11                     | 2.745  | 0.00000863 |
| <i>KCNK17</i>   | Potassium two pore domain channel subfamily K member 17                   | -2.535 | 0.00049    |
| <i>KCNK2</i>    | Potassium two pore domain channel subfamily K member 2                    | 2.212  | 0.00219    |
| <i>KCNMB1</i>   | Potassium calcium-activated channel subfamily M regulatory beta subunit 1 | -1.67  | 0.0343     |
| <i>KCNMB4</i>   | Potassium calcium-activated channel subfamily M regulatory beta subunit 4 | -1.75  | 0.00213    |
| <i>KCTD2</i>    | Potassium channel tetramerization domain containing 2                     | -1.554 | 0.000993   |
| <b>KDSR</b>     | 3-ketodihydrosphingosine reductase                                        | 1.691  | 0.0000561  |
| <i>KHK</i>      | Ketohexokinase                                                            | 2.253  | 0.000016   |
| <b>KIAA0408</b> | KIAA0408                                                                  | -1.929 | 0.00139    |
| <i>KIAA1614</i> | KIAA1614                                                                  | -1.795 | 0.000152   |
| <i>KIF1C</i>    | Kinesin family member 1C                                                  | 1.599  | 0.000238   |
| <i>KIF24</i>    | Kinesin family member 24                                                  | 1.946  | 0.0000821  |
| <i>KIF7</i>     | Kinesin family member 7                                                   | -1.728 | 0.00147    |

|                        |                                                                    |        |           |
|------------------------|--------------------------------------------------------------------|--------|-----------|
| <i>KIZ</i>             | Kizuna centrosomal protein                                         | -1.713 | 0.00783   |
| <i>KLF11</i>           | Kruppel like factor 11                                             | -1.609 | 0.0063    |
| <i>KLF4</i>            | Kruppel like factor 4                                              | -1.844 | 0.00291   |
| <i>KLF5</i>            | Kruppel like factor 5                                              | -2.21  | 0.00167   |
| <i>KLHDC8B</i>         | Kelch domain containing 8B                                         | 1.617  | 0.00834   |
| <i>KLHL25</i>          | Kelch like family member 25                                        | -2.818 | 3.67E-08  |
| <i>KLHL33</i>          | Kelch like family member 33                                        | 1.698  | 0.01      |
| <b><i>KLK7</i></b>     | Kallikrein related peptidase 7                                     | 3.095  | 0.00146   |
| <i>KPNA2</i>           | Karyopherin subunit alpha 2                                        | 1.623  | 0.000658  |
| <i>LAMB1</i>           | Laminin subunit beta 1                                             | -1.797 | 0.0000375 |
| <i>LAMC2</i>           | Laminin subunit gamma 2                                            | 2.093  | 0.0379    |
| <i>LAMTOR1</i>         | Late endosomal/lysosomal adaptor, MAPK and MTOR activator 1        | 1.528  | 0.00314   |
| <i>LARP6</i>           | La ribonucleoprotein domain family member 6                        | -1.884 | 0.000371  |
| <i>LCA5</i>            | LCA5, lebercilin                                                   | 2.56   | 0.00093   |
| <i>LCAT</i>            | Lecithin-cholesterol acyltransferase                               | -2.532 | 3.31E-08  |
| <b><i>LDHB</i></b>     | Lactate dehydrogenase B                                            | 1.767  | 0.00103   |
| <i>LDHC</i>            | Lactate dehydrogenase C                                            | 2.285  | 0.00283   |
| <i>LDHD</i>            | Lactate dehydrogenase D                                            | 1.965  | 0.000112  |
| <i>LDLRAD3</i>         | Low density lipoprotein receptor class A domain containing 3       | -1.977 | 0.0106    |
| <i>LENG9</i>           | Leukocyte receptor cluster member 9                                | 1.557  | 0.0202    |
| <b><i>LEP</i></b>      | Leptin                                                             | 2.757  | 0.0000702 |
| <i>LETM1</i>           | Leucine zipper and EF-hand containing transmembrane protein 1      | 1.58   | 0.0306    |
| <b><i>LGALS3BP</i></b> | Galectin 3 binding protein                                         | 1.509  | 0.0258    |
| <i>LHPP</i>            | Phospholysine phosphohistidine inorganic pyrophosphate phosphatase | 1.928  | 0.0000379 |
| <b><i>LIPA</i></b>     | Lipase A, lysosomal acid type                                      | 1.72   | 0.000189  |
| <i>LMO1</i>            | LIM domain only 1                                                  | 1.599  | 0.0313    |
| <i>LPCAT2</i>          | Lysophosphatidylcholine acyltransferase 2                          | 1.783  | 0.0157    |
| <i>LPCAT3</i>          | Lysophosphatidylcholine acyltransferase 3                          | -1.755 | 0.00602   |
| <i>LRAT</i>            | Lecithin retinol acyltransferase                                   | 4.349  | 0.00126   |
| <b><i>LRRC17</i></b>   | Leucine rich repeat containing 17                                  | 1.908  | 0.00245   |
| <i>LRRC20</i>          | Leucine rich repeat containing 20                                  | 1.553  | 0.0255    |
| <i>LRRC3</i>           | Leucine rich repeat containing 3                                   | -1.853 | 0.0318    |
| <i>LRRC8E</i>          | Leucine rich repeat containing 8 VRAC subunit E                    | 2.287  | 0.00503   |
| <i>LRRN4CL</i>         | LRRN4 C-terminal like                                              | 1.574  | 0.00232   |
| <b><i>LSR</i></b>      | Lipolysis stimulated lipoprotein receptor                          | -2.366 | 0.0000375 |

|                 |                                                      |        |             |
|-----------------|------------------------------------------------------|--------|-------------|
| <i>LSS</i>      | Lanosterol synthase                                  | 1.563  | 0.0396      |
| <i>LXN</i>      | Latexin                                              | -1.684 | 0.00709     |
| <i>LY6E</i>     | Lymphocyte antigen 6 family member E                 | 5.461  | 0.00000446  |
| <i>LYNX1</i>    | Ly6/neurotoxin 1                                     | 3.151  | 0.00000144  |
| <i>LZTFL1</i>   | Leucine zipper transcription factor like 1           | -1.504 | 0.0129      |
| <i>MAATS1</i>   | MYCBP associated and testis expressed 1              | -1.739 | 0.0241      |
| <i>MAFF</i>     | MAF bZIP transcription factor F                      | -2.501 | 0.000166    |
| <i>MAGED2</i>   | MAGE family member D2                                | -1.765 | 0.000000754 |
| <i>MAGIX</i>    | MAGI family member, X-linked                         | 1.829  | 0.0000171   |
| <i>MALT1</i>    | MALT1 paracaspase                                    | -1.512 | 0.00513     |
| <i>MAMLD1</i>   | Mastermind like domain containing 1                  | 2.107  | 0.0154      |
| <i>MAP1LC3A</i> | Microtubule associated protein 1 light chain 3 alpha | 1.622  | 0.0313      |
| <i>MAP2K6</i>   | Mitogen-activated protein kinase kinase 6            | 1.591  | 0.0155      |
| <i>MAP7</i>     | Microtubule associated protein 7                     | 1.741  | 0.0277      |
| <i>MAPT</i>     | Microtubule associated protein tau                   | -2.477 | 0.00116     |
| <i>MARCH2</i>   | Membrane associated ring-CH-type finger 2            | 1.923  | 0.0000232   |
| <i>MASPI</i>    | Mannan binding lectin serine peptidase 1             | 1.879  | 0.00151     |
| <i>MAT2A</i>    | Methionine adenosyltransferase 2A                    | -1.619 | 0.0126      |
| <i>MBLAC1</i>   | Metallo-beta-lactamase domain containing 1           | 1.516  | 0.0274      |
| <i>MCHR1</i>    | Melanin concentrating hormone receptor 1             | 2.343  | 0.01        |
| <i>MCUR1</i>    | Mitochondrial calcium uniporter regulator 1          | 1.674  | 0.000383    |
| <i>MDF1</i>     | MyoD family inhibitor                                | -2.119 | 0.0116      |
| <i>MDM1</i>     | Mdm1 nuclear protein                                 | -1.633 | 0.00406     |
| <i>ME1</i>      | Malic enzyme 1                                       | 1.701  | 0.0327      |
| <i>MEGF10</i>   | Multiple EGF like domains 10                         | 2.241  | 0.0458      |
| <i>MERTK</i>    | MER proto-oncogene, tyrosine kinase                  | -2.453 | 0.000186    |
| <i>METRNL</i>   | Meteorin like, glial cell differentiation regulator  | 2.043  | 0.000113    |
| <i>MFAP2</i>    | Microfibril associated protein 2                     | 1.557  | 0.0351      |
| <i>MFSD2B</i>   | Major facilitator superfamily domain containing 2B   | 1.692  | 0.0101      |
| <i>MGP</i>      | Matrix Gla protein                                   | 3.217  | 1.87E-08    |
| <i>MGST1</i>    | Microsomal glutathione S-transferase 1               | 1.952  | 0.00000224  |
| <i>MGST2</i>    | Microsomal glutathione S-transferase 2               | -1.504 | 0.0318      |
| <i>MLF1</i>     | Myeloid leukemia factor 1                            | -2.986 | 1.99E-14    |
| <i>MMD</i>      | Monocyte to macrophage differentiation associated    | 1.548  | 0.0134      |
| <i>MMP15</i>    | Matrix metalloproteinase 15                          | 1.642  | 0.00458     |

|                |                                                                                                 |        |           |
|----------------|-------------------------------------------------------------------------------------------------|--------|-----------|
| <i>MMP25</i>   | Matrix metalloproteinase 25                                                                     | 1.648  | 0.0265    |
| <i>MOB3B</i>   | MOB kinase activator 3B                                                                         | -1.763 | 0.00662   |
| <i>MOG</i>     | Myelin oligodendrocyte glycoprotein                                                             | 3.102  | 0.000643  |
| <i>MOK</i>     | MOK protein kinase                                                                              | -1.681 | 0.0224    |
| <i>MORN1</i>   | MORN repeat containing 1                                                                        | -1.539 | 0.035     |
| <i>MOSPD1</i>  | Motile sperm domain containing 1                                                                | 1.507  | 0.0358    |
| <i>MPC2</i>    | Mitochondrial pyruvate carrier 2                                                                | 1.663  | 0.0348    |
| <i>MPV17L</i>  | MPV17 mitochondrial inner membrane protein like                                                 | 2.244  | 0.000794  |
| <i>MRAS</i>    | Muscle RAS oncogene homolog                                                                     | 1.566  | 0.00277   |
| <i>MREG</i>    | Melanoregulin                                                                                   | 1.655  | 0.0287    |
| <i>MROH6</i>   | Maestro heat like repeat family member 6                                                        | 1.699  | 0.012     |
| <i>MRPL34</i>  | Mitochondrial ribosomal protein L34                                                             | 1.627  | 0.0206    |
| <i>MRPL51</i>  | Mitochondrial ribosomal protein L51                                                             | 1.509  | 0.0255    |
| <i>MSI2</i>    | Musashi RNA binding protein 2                                                                   | 1.61   | 0.0396    |
| <i>MSRA</i>    | Methionine sulfoxide reductase A                                                                | 1.721  | 0.000175  |
| <i>MT-ATP6</i> | ATP synthase F0 subunit 6                                                                       | 2.002  | 0.000422  |
| <i>MT-CO1</i>  | Cytochrome c oxidase subunit I                                                                  | 2.407  | 0.0000893 |
| <i>MT-CO2</i>  | Cytochrome c oxidase subunit II                                                                 | 2.193  | 0.00113   |
| <i>MT-CO3</i>  | Cytochrome c oxidase III                                                                        | 2.207  | 0.00023   |
| <i>MT-CYB</i>  | Cytochrome b                                                                                    | 2.14   | 0.00139   |
| <i>MT-ND1</i>  | NADH dehydrogenase, subunit 1 (complex I)                                                       | 1.984  | 0.000177  |
| <i>MT-ND2</i>  | MTND2                                                                                           | 1.727  | 0.00409   |
| <i>MT-ND3</i>  | NADH dehydrogenase, subunit 3 (complex I)                                                       | 2.518  | 0.0000224 |
| <i>MT-ND4</i>  | NADH dehydrogenase, subunit 4 (complex I)                                                       | 2.189  | 0.000069  |
| <i>MT-ND4L</i> | NADH dehydrogenase, subunit 4L (complex I)                                                      | 2.364  | 0.00496   |
| <i>MT-ND5</i>  | NADH dehydrogenase, subunit 5 (complex I)                                                       | 1.972  | 0.00236   |
| <i>MTA3</i>    | Metastasis associated 1 family member 3                                                         | -1.522 | 0.00139   |
| <i>MTERF2</i>  | Mitochondrial transcription termination factor 2                                                | 2.969  | 0.0000113 |
| <i>MTFMT</i>   | Mitochondrial methionyl-tRNA formyltransferase                                                  | 1.655  | 0.00783   |
| <i>MTHFD1</i>  | Methylenetetrahydrofolate dehydrogenase, cyclohydrolase and formyltetrahydrofolate synthetase 1 | 1.813  | 0.0000089 |
| <i>MTMR12</i>  | Myotubularin related protein 12                                                                 | -1.902 | 0.0287    |
| <i>MUSTN1</i>  | Musculoskeletal, embryonic nuclear protein 1                                                    | -3.686 | 0.00023   |
| <i>MXRA5</i>   | Matrix remodeling associated 5                                                                  | 1.933  | 0.00241   |
| <i>MYADM</i>   | Myeloid associated differentiation marker                                                       | -1.693 | 0.000993  |
| <i>MYC</i>     | MYC proto-oncogene, bHLH transcription factor                                                   | -2.287 | 0.0000877 |



|                |                                                          |        |           |
|----------------|----------------------------------------------------------|--------|-----------|
| <i>MYO1A</i>   | Myosin IA                                                | -1.841 | 0.00663   |
| <i>MYPOP</i>   | Myb related transcription factor, partner of profilin    | 1.596  | 0.00373   |
| <i>NAB2</i>    | NGFI-A binding protein 2                                 | -1.593 | 0.00116   |
| <i>NADK</i>    | NAD kinase                                               | 1.514  | 0.00409   |
| <i>NAP1L5</i>  | Nucleosome assembly protein 1 like 5                     | 1.546  | 0.00693   |
| <i>NCAPH</i>   | Non-SMC condensin I complex subunit H                    | -1.505 | 0.00685   |
| <i>NCK1</i>    | NCK adaptor protein 1                                    | -1.506 | 0.00497   |
| <i>NCS1</i>    | Neuronal calcium sensor 1                                | -1.626 | 0.000035  |
| <i>NDUFA1</i>  | NADH:ubiquinone oxidoreductase subunit A1                | 1.916  | 0.0000231 |
| <i>NDUFA10</i> | NADH:ubiquinone oxidoreductase subunit A10               | 2.002  | 0.0018    |
| <i>NDUFA13</i> | NADH:ubiquinone oxidoreductase subunit A13               | 1.783  | 0.0121    |
| <i>NDUFA2</i>  | NADH:ubiquinone oxidoreductase subunit A2                | 1.687  | 0.00867   |
| <i>NDUFA4</i>  | NDUFA4, mitochondrial complex associated                 | 1.666  | 0.0227    |
| <i>NDUFAB1</i> | NADH:ubiquinone oxidoreductase subunit AB1               | 1.692  | 0.0399    |
| <i>NDUFAF5</i> | NADH:ubiquinone oxidoreductase complex assembly factor 5 | 1.973  | 0.0197    |
| <i>NDUFAF7</i> | NADH:ubiquinone oxidoreductase complex assembly factor 7 | 1.752  | 0.000166  |
| <i>NDUFB3</i>  | NADH:ubiquinone oxidoreductase subunit B3                | 1.521  | 0.0374    |
| <i>NDUFS2</i>  | NADH:ubiquinone oxidoreductase core subunit S2           | 1.719  | 0.00614   |
| <i>NDUFS3</i>  | NADH:ubiquinone oxidoreductase core subunit S3           | 1.659  | 0.0354    |
| <i>NDUFS6</i>  | NADH:ubiquinone oxidoreductase subunit S6                | 1.737  | 0.0249    |
| <i>NDUFV1</i>  | NADH:ubiquinone oxidoreductase core subunit V1           | 2.138  | 0.00159   |
| <i>Nek10</i>   | NIMA (never in mitosis gene a)- related kinase 10        | -1.892 | 0.0314    |
| <i>NEK4</i>    | NIMA related kinase 4                                    | -1.587 | 0.0000474 |
| <i>NFKBIA</i>  | NFKB inhibitor alpha                                     | -2.176 | 0.000174  |
| <i>NIT1</i>    | Nitrilase 1                                              | 1.578  | 0.011     |
| <i>NKD2</i>    | Naked cuticle homolog 2                                  | 1.916  | 0.00349   |
| <i>NMB</i>     | Neuromedin B                                             | -7.157 | 0.000057  |
| <i>NMNAT2</i>  | Nicotinamide nucleotide adenylyltransferase 2            | 1.885  | 0.0000813 |
| <i>NOBOX</i>   | NOBOX oogenesis homeobox                                 | -2.205 | 0.000449  |
| <i>NOSTRIN</i> | Nitric oxide synthase trafficking                        | -1.638 | 0.012     |
| <i>NPAS3</i>   | Neuronal PAS domain protein 3                            | -2.282 | 0.00513   |
| <i>NPC2</i>    | NPC intracellular cholesterol transporter 2              | 1.502  | 0.00845   |
| <i>NPR1</i>    | Natriuretic peptide receptor 1                           | -1.853 | 0.00017   |
| <i>NQO1</i>    | NAD(P)H quinone dehydrogenase 1                          | 2.409  | 7.66E-08  |
| <i>Nradd</i>   | Neurotrophin receptor associated death domain            | -1.578 | 0.0151    |

|               |                                                                 |        |             |
|---------------|-----------------------------------------------------------------|--------|-------------|
| <i>NRBP2</i>  | Nuclear receptor binding protein 2                              | -1.721 | 0.0000926   |
| <i>NRIP3</i>  | Nuclear receptor interacting protein 3                          | -2.789 | 0.000906    |
| <i>NSDHL</i>  | NAD(P) dependent steroid dehydrogenase-like                     | 1.569  | 0.00101     |
| <i>NT5DC1</i> | 5'-nucleotidase domain containing 1                             | 1.52   | 0.00295     |
| <i>NTN5</i>   | Netrin 5                                                        | -3.115 | 0.0000734   |
| <i>OGA</i>    | O-GlcNAcase                                                     | -1.574 | 0.000333    |
| <i>OGFOD3</i> | 2-oxoglutarate and iron dependent oxygenase domain containing 3 | 1.89   | 0.000903    |
| <i>OGT</i>    | O-linked N-acetylglucosamine (GlcNAc) transferase               | -1.635 | 0.00249     |
| <i>OPRL1</i>  | Opioid related nociceptin receptor 1                            | -2.838 | 0.00000109  |
| <i>ORC1</i>   | Origin recognition complex subunit 1                            | 1.635  | 0.0348      |
| <i>ORM1</i>   | Orosomucoid 1                                                   | 9.407  | 3.73E-08    |
| <i>OSBP2</i>  | Oxysterol binding protein 2                                     | 2.478  | 0.0273      |
| <i>OXCT1</i>  | 3-oxoacid CoA-transferase 1                                     | 1.829  | 0.00047     |
| <i>P2RX4</i>  | Purinergic receptor P2X 4                                       | -1.511 | 0.000525    |
| <i>P2RX6</i>  | Purinergic receptor P2X 6                                       | 1.968  | 0.0234      |
| <i>P2RY2</i>  | Purinergic receptor P2Y2                                        | -1.875 | 0.00261     |
| <i>PACS1</i>  | Phosphofurin acidic cluster sorting protein 1                   | -1.704 | 0.00503     |
| <i>PANK3</i>  | Pantothenate kinase 3                                           | 1.885  | 0.0476      |
| <i>PARD6B</i> | Par-6 family cell polarity regulator beta                       | -2.166 | 0.0242      |
| <i>PARM1</i>  | Prostate androgen-regulated mucin-like protein 1                | 3.209  | 0.00000656  |
| <i>PARP3</i>  | Poly(ADP-ribose) polymerase family member 3                     | -1.663 | 0.0013      |
| <i>PATJ</i>   | PATJ, crumbs cell polarity complex component                    | -1.547 | 0.0158      |
| <i>PCCB</i>   | Propionyl-CoA carboxylase subunit beta                          | 1.598  | 0.0011      |
| <i>PCK1</i>   | Phosphoenolpyruvate carboxykinase 1                             | 2.351  | 0.00332     |
| <i>PCYT2</i>  | Phosphate cytidylyltransferase 2, ethanolamine                  | 1.726  | 0.0225      |
| <i>PDE5A</i>  | Phosphodiesterase 5A                                            | 1.787  | 0.00959     |
| <i>PDF</i>    | Peptide deformylase, mitochondrial                              | 1.921  | 0.0272      |
| <i>PDHAI</i>  | Pyruvate dehydrogenase E1 alpha 1 subunit                       | 1.63   | 0.0214      |
| <i>PDSS1</i>  | Decaprenyl diphosphate synthase subunit 1                       | -1.981 | 0.00398     |
| <i>PDXP</i>   | Pyridoxal phosphatase                                           | 1.901  | 0.000122    |
| <i>PDZRN3</i> | PDZ domain containing ring finger 3                             | 2.071  | 0.00102     |
| <i>PEBP1</i>  | Phosphatidylethanolamine binding protein 1                      | 2.151  | 0.000000202 |
| <i>PENK</i>   | Proenkephalin                                                   | 4.361  | 9.25E-08    |
| <i>PER1</i>   | Period circadian regulator 1                                    | -1.842 | 0.00472     |
| <i>PER2</i>   | Period circadian regulator 2                                    | -2.257 | 0.0028      |

|                |                                                                     |        |            |
|----------------|---------------------------------------------------------------------|--------|------------|
| <i>PFKFB2</i>  | 6-phosphofructo-2-kinase/fructose-2,6-biphosphatase 2               | 1.903  | 0.0000168  |
| <i>PGAM1</i>   | Phosphoglycerate mutase 1                                           | 1.523  | 0.0123     |
| <i>PGD</i>     | Phosphogluconate dehydrogenase                                      | 1.717  | 0.00476    |
| <i>PGF</i>     | Placental growth factor                                             | 2.404  | 0.0116     |
| <i>PGLYRP2</i> | Peptidoglycan recognition protein 2                                 | -3.307 | 0.00000198 |
| <i>PHKA2</i>   | Phosphorylase kinase regulatory subunit alpha 2                     | -1.712 | 0.000891   |
| <i>PHLDB3</i>  | Pleckstrin homology like domain family B member 3                   | -1.764 | 0.00312    |
| <i>PIGS</i>    | Phosphatidylinositol glycan anchor biosynthesis class S             | 1.754  | 0.00000112 |
| <i>PIR</i>     | Pirin                                                               | 1.64   | 0.000668   |
| <i>PITPNM1</i> | Phosphatidylinositol transfer protein membrane associated 1         | -1.592 | 0.000181   |
| <i>PKD2L1</i>  | Polycystin 2 like 1, transient receptor potential cation channel    | 4.764  | 1.9E-09    |
| <i>PKNOX1</i>  | PBX/knotted 1 homeobox 1                                            | -1.674 | 0.00014    |
| <i>PLA1A</i>   | Phospholipase A1 member A                                           | -1.509 | 0.0337     |
| <i>PLA2G5</i>  | Phospholipase A2 group V                                            | 4.817  | 0.00000015 |
| <i>PLAUR</i>   | Plasminogen activator, urokinase receptor                           | -1.595 | 0.0103     |
| <i>PLCD1</i>   | Phospholipase C delta 1                                             | -1.892 | 0.00000181 |
| <i>PLCH2</i>   | Phospholipase C eta 2                                               | -1.621 | 0.0223     |
| <i>PLD5</i>    | Phospholipase D family member 5                                     | -2.127 | 0.00584    |
| <i>PLEKHB1</i> | Pleckstrin homology domain containing B1                            | 2.9    | 0.00452    |
| <i>PLIN5</i>   | Perilipin 5                                                         | 1.817  | 0.0205     |
| <i>PLOD2</i>   | Procollagen-lysine,2-oxoglutarate 5-dioxygenase 2                   | -2.178 | 0.000247   |
| <i>PLP2</i>    | Proteolipid protein 2                                               | -1.64  | 0.000369   |
| <i>PLXDC1</i>  | Plexin domain containing 1                                          | 2.412  | 2.39E-08   |
| <i>PLXNA4</i>  | Plexin A4                                                           | -2.334 | 0.0206     |
| <i>PMEPA1</i>  | Prostate transmembrane protein, androgen induced 1                  | -1.768 | 0.00105    |
| <i>PNPO</i>    | Pyridoxamine 5'-phosphate oxidase                                   | 1.846  | 0.00586    |
| <i>POLA2</i>   | DNA polymerase alpha 2, accessory subunit                           | -1.987 | 0.00147    |
| <i>POLDIP2</i> | DNA polymerase delta interacting protein 2                          | 1.533  | 0.00503    |
| <i>POLE</i>    | DNA polymerase epsilon, catalytic subunit                           | 2.037  | 0.0195     |
| <i>Poln</i>    | DNA polymerase N                                                    | 1.93   | 0.00123    |
| <i>POLR2E</i>  | RNA polymerase II subunit E                                         | 1.657  | 0.00286    |
| <i>POLR3G</i>  | RNA polymerase III subunit G                                        | 1.96   | 0.0135     |
| <i>POLR3H</i>  | RNA polymerase III subunit H                                        | 2.01   | 0.00387    |
| <i>POLR3K</i>  | RNA polymerase III subunit K                                        | 1.641  | 0.00626    |
| <i>PPDPF</i>   | Pancreatic progenitor cell differentiation and proliferation factor | -1.932 | 0.0038     |

|                       |                                                         |          |             |
|-----------------------|---------------------------------------------------------|----------|-------------|
| <b><i>PPIP5K1</i></b> | Diphosphoinositol pentakisphosphate kinase 1            | 1.619    | 0.00871     |
| <i>PPP1R2</i>         | Protein phosphatase 1 regulatory inhibitor subunit 2    | 1.545    | 0.0243      |
| <i>PPP5C</i>          | Protein phosphatase 5 catalytic subunit                 | -2.438   | 0.000186    |
| <i>PPT1</i>           | Palmitoyl-protein thioesterase 1                        | 1.535    | 0.0000202   |
| <i>PRDM16</i>         | PR/SET domain 16                                        | -1.9     | 0.0383      |
| <i>PRDX1</i>          | Peroxiredoxin 1                                         | 1.853    | 0.000788    |
| <b><i>PRDX3</i></b>   | Peroxiredoxin 3                                         | 1.618    | 0.00209     |
| <i>PRNP</i>           | Prion protein                                           | 1.532    | 0.00383     |
| <i>PROX2</i>          | Prospero homeobox 2                                     | 1.789    | 0.0143      |
| <i>PROZ</i>           | Protein Z, vitamin K dependent plasma glycoprotein      | -2.227   | 0.00249     |
| <i>PRPS2</i>          | Phosphoribosyl pyrophosphate synthetase 2               | 1.764    | 0.0358      |
| <i>PRR19</i>          | Proline rich 19                                         | -1.61    | 0.0398      |
| <b><i>PRR5L</i></b>   | Proline rich 5 like                                     | -1.502   | 0.00237     |
| <i>PRRT4</i>          | Proline rich transmembrane protein 4                    | 3.362    | 7.58E-15    |
| <i>PRSS23</i>         | Serine protease 23                                      | -2.019   | 0.00198     |
| <b><i>PRUNE2</i></b>  | Prune homolog 2                                         | 3.376    | 0.0078      |
| <b><i>PSPH</i></b>    | Phosphoserine phosphatase                               | -2.075   | 0.00213     |
| <i>PTGR1</i>          | Prostaglandin reductase 1                               | 1.603    | 0.0482      |
| <b><i>PTGS2</i></b>   | Prostaglandin-endoperoxide synthase 2                   | -3.065   | 0.0155      |
| <i>PTPRD</i>          | Protein tyrosine phosphatase, receptor type D           | -2.201   | 0.0217      |
| <i>PTPRS</i>          | Protein tyrosine phosphatase, receptor type S           | -1.67    | 0.00503     |
| <i>PTX3</i>           | Pentraxin 3                                             | -102.543 | 1.56E-19    |
| <i>PVALB</i>          | Parvalbumin                                             | 8.43     | 6.44E-11    |
| <i>PWWP2B</i>         | PWWP domain containing 2B                               | -1.601   | 0.00698     |
| <b><i>QPCT</i></b>    | Glutaminyl-peptide cyclotransferase                     | 1.932    | 0.000000115 |
| <i>RAB26</i>          | RAB26, member RAS oncogene family                       | 1.726    | 0.0264      |
| <i>RAB27B</i>         | RAB27B, member RAS oncogene family                      | -2.037   | 0.0398      |
| <i>RAB3A</i>          | RAB3A, member RAS oncogene family                       | 1.96     | 0.00152     |
| <i>RAD51B</i>         | RAD51 paralog B                                         | 2.303    | 0.000142    |
| <i>RALGAPA2</i>       | Ral GTPase activating protein catalytic alpha subunit 2 | -1.763   | 0.00435     |
| <i>RARRES2</i>        | Retinoic acid receptor responder 2                      | -2.54    | 0.00192     |
| <i>RASA3</i>          | RAS p21 protein activator 3                             | -2.235   | 2.85E-09    |
| <b><i>RASAL1</i></b>  | RAS protein activator like 1                            | -1.607   | 0.00516     |
| <i>RASD1</i>          | Ras related dexamethasone induced 1                     | -1.508   | 0.0316      |
| <i>RASEF</i>          | RAS and EF-hand domain containing                       | 2.222    | 0.000906    |

|                      |                                                           |        |             |
|----------------------|-----------------------------------------------------------|--------|-------------|
| <i>RASGRP2</i>       | RAS guanyl releasing protein 2                            | -1.737 | 0.00203     |
| <i>RASL11B</i>       | RAS like family 11 member B                               | -2.261 | 0.0000278   |
| <i>RASSF7</i>        | Ras association domain family member 7                    | -1.705 | 0.0131      |
| <i>RBM47</i>         | RNA binding motif protein 47                              | 3.13   | 0.00000756  |
| <i>RBMX2</i>         | RNA binding motif protein X-linked 2                      | -2.347 | 0.00000506  |
| <i>RCN3</i>          | Reticulocalbin 3                                          | 1.605  | 0.0179      |
| <i>RDH10</i>         | Retinol dehydrogenase 10                                  | -1.62  | 0.0132      |
| <i>RDH16</i>         | Retinol dehydrogenase 16                                  | -4.707 | 0.00189     |
| <i>RET</i>           | Ret proto-oncogene                                        | 1.741  | 0.0358      |
| <b><i>RETSAT</i></b> | Retinol saturase                                          | 2.172  | 0.00151     |
| <i>REV3L</i>         | REV3 like, DNA directed polymerase zeta catalytic subunit | -1.712 | 0.00374     |
| <i>REX1BD</i>        | Required for excision 1-B domain containing               | 1.579  | 0.0244      |
| <i>REXO2</i>         | RNA exonuclease 2                                         | 1.68   | 0.00832     |
| <i>RGD1561161</i>    | Similar to BC067074 protein                               | -1.627 | 0.0214      |
| <i>RGN</i>           | Regucalcin                                                | 1.589  | 0.0000503   |
| <i>RGS1</i>          | Regulator of G protein signaling 1                        | -2.883 | 0.0135      |
| <i>RGS3</i>          | Regulator of G protein signaling 3                        | -1.679 | 0.0011      |
| <i>RHOB</i>          | Ras homolog family member B                               | -1.681 | 0.00958     |
| <i>RIBC1</i>         | RIB43A domain with coiled-coils 1                         | -1.832 | 0.0241      |
| <b><i>RIDA</i></b>   | Reactive intermediate imine deaminase A homolog           | 1.519  | 0.0112      |
| <i>RIMKLA</i>        | Ribosomal modification protein rimK like family member A  | 3.998  | 0.000000031 |
| <i>RIMKLB</i>        | Ribosomal modification protein rimK like family member B  | -1.549 | 0.0276      |
| <i>RNASE1</i>        | Ribonuclease A family member 1, pancreatic                | 1.7    | 0.0332      |
| <i>RNASEH2A</i>      | Ribonuclease H2 subunit A                                 | 1.66   | 0.00172     |
| <i>RNF125</i>        | Ring finger protein 125                                   | 2.116  | 0.000486    |
| <i>RNF128</i>        | Ring finger protein 128, E3 ubiquitin protein ligase      | 3.011  | 0.000000126 |
| <i>RNF157</i>        | Ring finger protein 157                                   | 1.654  | 0.0107      |
| <i>RNF217</i>        | Ring finger protein 217                                   | -2.455 | 0.0000381   |
| <b><i>ROBO1</i></b>  | Roundabout guidance receptor 1                            | 1.732  | 0.00937     |
| <i>ROBO2</i>         | Roundabout guidance receptor 2                            | -2.554 | 0.00000751  |
| <i>RORC</i>          | RAR related orphan receptor C                             | -2.21  | 0.00222     |
| <i>RPL3</i>          | Ribosomal protein L3                                      | -1.536 | 0.0036      |
| <i>RPLP0</i>         | Ribosomal protein lateral stalk subunit P0                | -1.604 | 0.0091      |
| <i>RTL1</i>          | Retrotransposon Gag like 1                                | -5.673 | 0.000000884 |
| <i>RYR1</i>          | Ryanodine receptor 1                                      | -1.529 | 0.00394     |

|                        |                                                               |        |            |
|------------------------|---------------------------------------------------------------|--------|------------|
| <i>S100A10</i>         | S100 calcium binding protein A10                              | 2.054  | 0.0000288  |
| <i>S100B</i>           | S100 calcium binding protein B                                | 2.398  | 6.03E-11   |
| <i>S1PR3</i>           | Sphingosine-1-phosphate receptor 3                            | -2.401 | 0.000915   |
| <i>SAMD11</i>          | Sterile alpha motif domain containing 11                      | -1.744 | 0.0089     |
| <i>SAMSN1</i>          | SAM domain, SH3 domain and nuclear localization signals 1     | 2.342  | 0.0000085  |
| <i>SCD</i>             | Stearoyl-CoA desaturase                                       | 3.395  | 0.0216     |
| <i>SCN9A</i>           | Sodium voltage-gated channel alpha subunit 9                  | -2.695 | 0.00011    |
| <i>SCPEP1</i>          | Serine carboxypeptidase 1                                     | 1.597  | 0.000422   |
| <i>SCUBE2</i>          | Signal peptide, CUB domain and EGF like domain containing 2   | -2.028 | 0.000248   |
| <i>SCUBE3</i>          | Signal peptide, CUB domain and EGF like domain containing 3   | 3.267  | 0.00693    |
| <b><i>SDC4</i></b>     | Syndecan 4                                                    | -1.784 | 0.0000172  |
| <i>SDCBP2</i>          | Syndecan binding protein 2                                    | -2.02  | 0.00199    |
| <i>SDHA</i>            | Succinate dehydrogenase complex flavoprotein subunit A        | 2.162  | 0.000183   |
| <i>SDHC</i>            | Succinate dehydrogenase complex subunit C                     | 1.507  | 0.0155     |
| <i>SDS</i>             | Serine dehydratase                                            | 1.638  | 0.0398     |
| <i>Sectm1b</i>         | Secreted and transmembrane 1B                                 | -3.722 | 0.000256   |
| <b><i>SEL1L3</i></b>   | SEL1L family member 3                                         | 10.15  | 9.12E-15   |
| <i>SELENOW</i>         | Selenoprotein W                                               | 1.86   | 0.00218    |
| <i>SEPT6</i>           | Septin 6                                                      | -2.027 | 0.00000175 |
| <i>SERF2</i>           | Small EDRK-rich factor 2                                      | 1.786  | 0.00167    |
| <i>SERINC2</i>         | Serine incorporator 2                                         | 1.848  | 0.0478     |
| <i>SERPINA5</i>        | Serpin family A member 5                                      | 11.098 | 6.99E-24   |
| <i>SERPINB1</i>        | Serpin family B member 1                                      | -1.53  | 0.0051     |
| <b><i>SERPINF1</i></b> | Serpin family F member 1                                      | 1.701  | 0.0000373  |
| <i>SESNI</i>           | Sestrin 1                                                     | -1.55  | 0.0175     |
| <i>SETD9</i>           | SET domain containing 9                                       | -1.58  | 0.00112    |
| <i>SFT2D3</i>          | SFT2 domain containing 3                                      | -1.6   | 0.0135     |
| <i>SGCA</i>            | Sarcoglycan alpha                                             | 1.904  | 0.0148     |
| <i>SGK1</i>            | Serum/glucocorticoid regulated kinase 1                       | -1.701 | 0.00783    |
| <i>SGTB</i>            | Small glutamine rich tetratricopeptide repeat containing beta | -2.044 | 0.0104     |
| <b><i>SH2B2</i></b>    | SH2B adaptor protein 2                                        | -1.738 | 0.0366     |
| <i>SH2D7</i>           | SH2 domain containing 7                                       | 2.812  | 0.00000022 |
| <b><i>SH3BGRL2</i></b> | SH3 domain binding glutamate rich protein like 2              | -1.871 | 0.0478     |
| <b><i>SH3GL2</i></b>   | SH3 domain containing GRB2 like 2, endophilin A1              | 1.552  | 0.0337     |
| <i>SHISAL2A</i>        | Shisa like 2A                                                 | -2.431 | 0.00234    |

|                 |                                                                                 |        |             |
|-----------------|---------------------------------------------------------------------------------|--------|-------------|
| <b>SHROOM1</b>  | Shroom family member 1                                                          | -1.574 | 0.0143      |
| <i>SINHCAF</i>  | SIN3-HDAC complex associated factor                                             | -1.536 | 0.00407     |
| <i>SIRPA</i>    | Signal regulatory protein alpha                                                 | 1.889  | 2.39E-08    |
| <i>SIRT3</i>    | Sirtuin 3                                                                       | 1.793  | 0.000281    |
| <i>SKAP1</i>    | Src kinase associated phosphoprotein 1                                          | -2.306 | 0.0000185   |
| <i>SLC12A4</i>  | Solute carrier family 12 member 4                                               | -1.675 | 0.000267    |
| <b>SLC16A1</b>  | Solute carrier family 16 member 1                                               | 1.86   | 0.0224      |
| <i>SLC16A11</i> | Solute carrier family 16 member 11                                              | -2.36  | 0.000000102 |
| <i>SLC16A14</i> | Solute carrier family 16 member 14                                              | -2.241 | 0.00368     |
| <i>SLC19A3</i>  | Solute carrier family 19 member 3                                               | 2.36   | 0.00000598  |
| <i>SLC1A1</i>   | Solute carrier family 1 member 1                                                | 4.13   | 0.00000102  |
| <i>SLC1A5</i>   | Solute carrier family 1 member 5                                                | -1.758 | 0.033       |
| <i>SLC22A23</i> | Solute carrier family 22 member 23                                              | 1.718  | 0.0447      |
| <b>SLC22A3</b>  | Solute carrier family 22 member 3                                               | 1.955  | 0.00462     |
| <i>SLC23A3</i>  | Solute carrier family 23 member 3                                               | -2.094 | 0.000919    |
| <b>Slc25a1</b>  | Solute carrier family 25 (mitochondrial carrier, citrate transporter), member 1 | 2.973  | 0.0000652   |
| <b>SLC25A20</b> | Solute carrier family 25 member 20                                              | 1.644  | 0.00952     |
| <i>SLC25A25</i> | Solute carrier family 25 member 25                                              | -1.553 | 0.0388      |
| <b>SLC25A4</b>  | Solute carrier family 25 member 4                                               | 2.19   | 0.0102      |
| <i>SLC26A8</i>  | Solute carrier family 26 member 8                                               | 3.229  | 0.000902    |
| <i>SLC27A3</i>  | Solute carrier family 27 member 3                                               | -4.629 | 2.96E-09    |
| <i>SLC28A1</i>  | Solute carrier family 28 member 1                                               | 2.357  | 0.00314     |
| <b>SLC29A2</b>  | Solute carrier family 29 member 2                                               | -1.664 | 0.0273      |
| <i>SLC35G2</i>  | Solute carrier family 35 member G2                                              | -1.7   | 0.00474     |
| <i>SLC38A3</i>  | Solute carrier family 38 member 3                                               | -2.586 | 0.00414     |
| <i>SLC39A13</i> | Solute carrier family 39 member 13                                              | -1.572 | 0.000357    |
| <i>SLC44A3</i>  | Solute carrier family 44 member 3                                               | 2.187  | 0.000384    |
| <i>SLC45A4</i>  | Solute carrier family 45 member 4                                               | 2.174  | 0.0000656   |
| <b>SLC46A3</b>  | Solute carrier family 46 member 3                                               | 1.774  | 0.00000294  |
| <i>SLC4A10</i>  | Solute carrier family 4 member 10                                               | 2.423  | 0.00593     |
| <b>SLC4A11</b>  | Solute carrier family 4 member 11                                               | -2.415 | 0.000487    |
| <i>SLC4A4</i>   | Solute carrier family 4 member 4                                                | 4.255  | 0.0000168   |
| <i>SLC4A5</i>   | Solute carrier family 4 member 5                                                | 2.334  | 0.00793     |
| <i>SLC50A1</i>  | Solute carrier family 50 member 1                                               | -1.644 | 0.000142    |
| <i>SLC5A6</i>   | Solute carrier family 5 member 6                                                | 1.979  | 0.00519     |

|                      |                                                                                                   |        |             |
|----------------------|---------------------------------------------------------------------------------------------------|--------|-------------|
| <i>SLC6A9</i>        | Solute carrier family 6 member 9                                                                  | -1.738 | 0.00129     |
| <i>SMARCA1</i>       | SWI/SNF related, matrix associated, actin dependent regulator of chromatin, subfamily a, member 1 | -1.746 | 0.00148     |
| <i>SMTNL2</i>        | Smoothelin like 2                                                                                 | 1.537  | 0.0298      |
| <i>SNAPC1</i>        | Small nuclear RNA activating complex polypeptide 1                                                | -2.606 | 0.00000703  |
| <i>SNAPC5</i>        | Small nuclear RNA activating complex polypeptide 5                                                | 1.936  | 0.00000224  |
| <i>SNCG</i>          | Synuclein gamma                                                                                   | -2.272 | 0.0137      |
| <i>SNN</i>           | Stannin                                                                                           | 1.567  | 0.00578     |
| <i>SOBP</i>          | Sine oculis binding protein homolog                                                               | 2.439  | 0.00000207  |
| <i>SOCS1</i>         | Suppressor of cytokine signaling 1                                                                | -1.921 | 0.00319     |
| <i>SOCS2</i>         | Suppressor of cytokine signaling 2                                                                | -1.979 | 0.00000188  |
| <i>SOD1</i>          | Superoxide dismutase 1                                                                            | 1.585  | 0.00044     |
| <i>SOD2</i>          | Superoxide dismutase 2                                                                            | 1.853  | 0.000523    |
| <i>SORCS2</i>        | Sortilin related VPS10 domain containing receptor 2                                               | -1.779 | 0.0483      |
| <b><i>SORD</i></b>   | Sorbitol dehydrogenase                                                                            | 1.921  | 0.00000311  |
| <i>SORT1</i>         | Sortilin 1                                                                                        | 1.717  | 0.00000746  |
| <b><i>SOX17</i></b>  | SRY-box 17                                                                                        | -1.521 | 0.0332      |
| <b><i>SPARC</i></b>  | Secreted protein acidic and cysteine rich                                                         | 1.644  | 0.000357    |
| <i>SPATA6</i>        | Spermatogenesis associated 6                                                                      | -1.617 | 0.0145      |
| <i>SPEF1</i>         | Sperm flagellar 1                                                                                 | 2.774  | 0.0000652   |
| <i>SPEF2</i>         | Sperm flagellar 2                                                                                 | -6.933 | 4.83E-15    |
| <i>SPINT2</i>        | Serine peptidase inhibitor, Kunitz type 2                                                         | -1.664 | 0.000777    |
| <i>SPON2</i>         | Spondin 2                                                                                         | 1.583  | 0.03        |
| <i>SPTLC3</i>        | Serine palmitoyltransferase long chain base subunit 3                                             | 1.576  | 0.0395      |
| <i>SRC</i>           | SRC proto-oncogene, non-receptor tyrosine kinase                                                  | -1.551 | 0.0136      |
| <i>SRCIN1</i>        | SRC kinase signaling inhibitor 1                                                                  | -1.971 | 0.00553     |
| <b><i>SRD5A1</i></b> | Steroid 5 alpha-reductase 1                                                                       | 2.097  | 0.00000031  |
| <b><i>SSC5D</i></b>  | Scavenger receptor cysteine rich family member with 5 domains                                     | 1.503  | 0.000893    |
| <i>SSR3</i>          | Signal sequence receptor subunit 3                                                                | -1.518 | 0.00051     |
| <b><i>SSUH2</i></b>  | Ssu-2 homolog (C. elegans)                                                                        | -2.571 | 0.0011      |
| <i>STAT6</i>         | Signal transducer and activator of transcription 6                                                | -2.159 | 5.13E-09    |
| <i>STK10</i>         | Serine/threonine kinase 10                                                                        | -1.502 | 0.0244      |
| <i>STK40</i>         | Serine/threonine kinase 40                                                                        | 1.596  | 0.00919     |
| <i>STS</i>           | Steroid sulfatase                                                                                 | 4.584  | 0.00000144  |
| <i>STX12</i>         | Syntaxin 12                                                                                       | -1.964 | 0.000175    |
| <i>STX17</i>         | Syntaxin 17                                                                                       | -1.783 | 0.000000897 |



|                |                                                                        |        |             |
|----------------|------------------------------------------------------------------------|--------|-------------|
| <i>STXBP2</i>  | Syntaxin binding protein 2                                             | -1.862 | 0.000000378 |
| <i>SULF1</i>   | Sulfatase 1                                                            | 1.788  | 0.0109      |
| <i>Sult1a1</i> | Sulfotransferase family 1A, phenol-preferring, member 1                | 1.565  | 0.0165      |
| <i>SULT1C4</i> | Sulfotransferase family 1C member 4                                    | -2.612 | 0.00996     |
| <i>SWT1</i>    | SWT1, RNA endoribonuclease homolog                                     | -1.773 | 0.0000203   |
| <i>SYN2</i>    | Synapsin II                                                            | 1.565  | 0.0000494   |
| <i>SYNPO2</i>  | Synaptopodin 2                                                         | -1.595 | 0.04        |
| <i>SYT17</i>   | Synaptotagmin 17                                                       | -2.898 | 0.00558     |
| <i>TAF1D</i>   | TATA-box binding protein associated factor, RNA polymerase I subunit D | -1.773 | 0.0000321   |
| <i>TALDO1</i>  | Transaldolase 1                                                        | 1.909  | 0.00157     |
| <b>TARSL2</b>  | Threonyl-tRNA synthetase like 2                                        | -2.348 | 0.00157     |
| <i>TBC1D20</i> | TBC1 domain family member 20                                           | 1.765  | 0.0000606   |
| <i>TBKBP1</i>  | TBK1 binding protein 1                                                 | -1.526 | 0.00373     |
| <i>TBX19</i>   | T-box 19                                                               | -1.589 | 0.0214      |
| <i>TCAF1</i>   | TRPM8 channel associated factor 1                                      | -1.511 | 0.000372    |
| <i>TCAF2</i>   | TRPM8 channel associated factor 2                                      | -1.682 | 0.00729     |
| <i>TCF21</i>   | Transcription factor 21                                                | -2.887 | 0.000878    |
| <i>TCF23</i>   | Transcription factor 23                                                | 2.127  | 0.0000293   |
| <i>TCIM</i>    | Transcriptional and immune response regulator                          | -1.807 | 0.00324     |
| <i>Tdh</i>     | L-threonine dehydrogenase                                              | 7.054  | 0.000239    |
| <i>TDRD5</i>   | Tudor domain containing 5                                              | 2.625  | 0.00574     |
| <i>TECR</i>    | Trans-2,3-enoyl-CoA reductase                                          | 1.53   | 0.0322      |
| <i>TEKT3</i>   | Tektin 3                                                               | -1.935 | 0.0478      |
| <i>TENM3</i>   | Teneurin transmembrane protein 3                                       | 1.697  | 0.0175      |
| <i>TF</i>      | Transferrin                                                            | 2.921  | 0.000777    |
| <i>TGM3</i>    | Transglutaminase 3                                                     | 7.144  | 0.0000346   |
| <i>TGM5</i>    | Transglutaminase 5                                                     | 3.074  | 0.00196     |
| <i>Tha1</i>    | Threonine aldolase 1                                                   | 1.559  | 0.00472     |
| <i>THBS2</i>   | Thrombospondin 2                                                       | 2.053  | 0.00496     |
| <i>THEM6</i>   | Thioesterase superfamily member 6                                      | 2.084  | 0.00458     |
| <i>THRB</i>    | Thyroid hormone receptor beta                                          | 2.005  | 0.000308    |
| <b>THRSP</b>   | Thyroid hormone responsive                                             | 3.748  | 3.91E-12    |
| <i>THY1</i>    | Thy-1 cell surface antigen                                             | 1.728  | 0.000992    |
| <i>TIGAR</i>   | TP53 induced glycolysis regulatory phosphatase                         | 1.606  | 0.0276      |
| <i>TIMM23</i>  | Translocase of inner mitochondrial membrane 23                         | 1.72   | 0.00399     |

|                         |                                                                        |        |            |
|-------------------------|------------------------------------------------------------------------|--------|------------|
| <i>TIMP2</i>            | TIMP metalloproteinase inhibitor 2                                     | -1.536 | 0.0339     |
| <b><i>TKT</i></b>       | transketolase                                                          | 1.543  | 0.0313     |
| <i>TLN2</i>             | Talin 2                                                                | 1.588  | 0.0329     |
| <i>TLNRD1</i>           | Talin rod domain containing 1                                          | -1.666 | 0.000877   |
| <i>TLR8</i>             | Toll like receptor 8                                                   | 2.459  | 0.000405   |
| <i>TMBIM6</i>           | Transmembrane BAX inhibitor motif containing 6                         | 1.909  | 1.44E-09   |
| <i>TMC6</i>             | Transmembrane channel like 6                                           | -1.546 | 0.000118   |
| <i>TMC8</i>             | Transmembrane channel like 8                                           | -1.794 | 0.000902   |
| <i>TMEFF2</i>           | Transmembrane protein with EGF like and two follistatin like domains 2 | 2.054  | 0.00416    |
| <i>TMEM106C</i>         | Transmembrane protein 106C                                             | 1.777  | 0.0126     |
| <i>TMEM107</i>          | Transmembrane protein 107                                              | -1.697 | 0.0453     |
| <i>TMEM110-MUSTN1</i>   | TMEM110-MUSTN1 readthrough                                             | 2.173  | 0.00000452 |
| <b><i>TMEM119</i></b>   | Transmembrane protein 119                                              | 2.43   | 0.000929   |
| <i>TMEM132C</i>         | Transmembrane protein 132C                                             | -2.636 | 0.0000185  |
| <i>TMEM132E</i>         | Transmembrane protein 132E                                             | 3.231  | 0.00000224 |
| <i>TMEM160</i>          | Transmembrane protein 160                                              | 2.04   | 0.00249    |
| <i>TMEM163</i>          | Transmembrane protein 163                                              | -1.991 | 0.00155    |
| <i>TMEM187</i>          | Transmembrane protein 187                                              | 1.505  | 0.00584    |
| <i>TMEM202</i>          | Transmembrane protein 202                                              | 3.302  | 0.0000162  |
| <i>TMEM236</i>          | Transmembrane protein 236                                              | -4.111 | 0.0167     |
| <i>TMEM249</i>          | Transmembrane protein 249                                              | 1.61   | 0.012      |
| <i>TMEM254</i>          | Transmembrane protein 254                                              | -2.3   | 2.11E-08   |
| <i>TNFAIP6</i>          | TNF alpha induced protein 6                                            | -2.949 | 0.00000224 |
| <b><i>TNFRSF12A</i></b> | TNF receptor superfamily member 12A                                    | -1.894 | 0.0167     |
| <i>TNFRSF4</i>          | TNF receptor superfamily member 4                                      | -1.728 | 0.0227     |
| <i>TNFRSF6B</i>         | TNF receptor superfamily member 6b                                     | -2.957 | 0.00156    |
| <i>TNNI2</i>            | Troponin I2, fast skeletal type                                        | -7.543 | 2.73E-14   |
| <i>TNS2</i>             | Tensin 2                                                               | -1.648 | 0.0000901  |
| <i>TOM1L1</i>           | Target of myb1 like 1 membrane trafficking protein                     | -1.804 | 0.000102   |
| <i>Tomm5</i>            | Translocase of outer mitochondrial membrane 5                          | 2.002  | 0.00326    |
| <i>TP53INP2</i>         | Tumor protein p53 inducible nuclear protein 2                          | 2.032  | 0.0114     |
| <i>TRAF3IP2</i>         | TRAF3 interacting protein 2                                            | -1.726 | 0.0000723  |
| <i>TRAF4</i>            | TNF receptor associated factor 4                                       | 1.661  | 0.00385    |
| <i>TRAP1</i>            | TNF receptor associated protein 1                                      | 1.652  | 0.00887    |

|                      |                                                                    |        |             |
|----------------------|--------------------------------------------------------------------|--------|-------------|
| <i>TRIP13</i>        | Thyroid hormone receptor interactor 13                             | -1.517 | 0.0195      |
| <i>TSPAN4</i>        | Tetraspanin 4                                                      | -1.712 | 0.000648    |
| <b><i>TSPAN7</i></b> | Ttraspanin 7                                                       | 2.317  | 9.48E-11    |
| <i>Tstd3</i>         | Thiosulfate sulfurtransferase (rhodanese)-like domain containing 3 | 1.725  | 0.0301      |
| <i>TTC12</i>         | Tetratricopeptide repeat domain 12                                 | -2.579 | 0.000193    |
| <i>TTC19</i>         | Tetratricopeptide repeat domain 19                                 | 1.557  | 0.00752     |
| <i>TTC25</i>         | Tetratricopeptide repeat domain 25                                 | 5.97   | 0.00000012  |
| <i>TTC9</i>          | Tetratricopeptide repeat domain 9                                  | -1.71  | 0.0175      |
| <i>TTN</i>           | Titin                                                              | -2.92  | 0.01        |
| <i>TPA</i>           | Alpha tocopherol transfer protein                                  | -1.974 | 0.0337      |
| <i>TUBA1B</i>        | Tubulin alpha 1b                                                   | -1.664 | 0.0242      |
| <i>TUBB</i>          | Tubulin beta class I                                               | -2.067 | 0.0000657   |
| <i>TUBB4B</i>        | Tubulin beta 4B class IVb                                          | -1.569 | 0.0236      |
| <i>TUBB6</i>         | Tubulin beta 6 class V                                             | -1.535 | 0.0091      |
| <i>TWIST2</i>        | Twist family bHLH transcription factor 2                           | 1.745  | 0.0000507   |
| <b><i>TXN2</i></b>   | Thioredoxin 2                                                      | 1.675  | 0.0138      |
| <i>TXNIP</i>         | Thioredoxin interacting protein                                    | -1.703 | 0.0175      |
| <i>TXNRD2</i>        | Thioredoxin reductase 2                                            | 1.552  | 0.0041      |
| <i>TYRP1</i>         | Tyrosinase related protein 1                                       | 3.69   | 0.00011     |
| <i>UBC</i>           | Ubiquitin C                                                        | 1.89   | 0.000000194 |
| <i>UBXN11</i>        | UBX domain protein 11                                              | -1.84  | 0.00677     |
| <i>UCHL1</i>         | Tbiquitin C-terminal hydrolase L1                                  | -2.95  | 0.00515     |
| <i>UCHL3</i>         | Ubiquitin C-terminal hydrolase L3                                  | 1.677  | 0.00954     |
| <b><i>UQCR10</i></b> | Ubiquinol-cytochrome c reductase, complex III subunit X            | 2.022  | 0.00133     |
| <b><i>UQCR11</i></b> | Ubiquinol-cytochrome c reductase, complex III subunit XI           | 1.897  | 0.00519     |
| <i>UQCRC1</i>        | Ubiquinol-cytochrome c reductase core protein 1                    | 1.776  | 0.00941     |
| <i>UQCRFS1</i>       | Ubiquinol-cytochrome c reductase, Rieske iron-sulfur polypeptide 1 | 1.659  | 0.022       |
| <i>VAMP8</i>         | Vesicle associated membrane protein 8                              | 1.634  | 0.00551     |
| <i>VAV3</i>          | Vav guanine nucleotide exchange factor 3                           | 1.728  | 0.0195      |
| <i>VCAM1</i>         | Vascular cell adhesion molecule 1                                  | 1.755  | 0.00301     |
| <i>VCAN</i>          | Versican                                                           | -1.959 | 0.0119      |
| <i>VEGFA</i>         | Vascular endothelial growth factor A                               | -1.593 | 0.0191      |
| <i>VIM</i>           | Vimentin                                                           | -1.509 | 0.0292      |
| <i>VIPR2</i>         | Vasoactive intestinal peptide receptor 2                           | 1.742  | 0.0238      |
| <i>VLDLR</i>         | Very low density lipoprotein receptor                              | 1.606  | 0.012       |

|                      |                                                  |        |            |
|----------------------|--------------------------------------------------|--------|------------|
| <i>VSTM2L</i>        | V-set and transmembrane domain containing 2 like | -1.702 | 0.0132     |
| <i>VWA2</i>          | Von Willebrand factor A domain containing 2      | 2.037  | 0.0038     |
| <i>WARS2</i>         | Tryptophanyl tRNA synthetase 2, mitochondrial    | -1.657 | 0.00000756 |
| <i>WFS1</i>          | Wolframin ER transmembrane glycoprotein          | -1.62  | 0.00701    |
| <b><i>WISP2</i></b>  | WNT1 inducible signaling pathway protein 2       | 2.038  | 0.00698    |
| <i>WNK4</i>          | WNK lysine deficient protein kinase 4            | -1.691 | 0.00126    |
| <i>WNT11</i>         | Wnt family member 11                             | 1.603  | 0.00832    |
| <i>XDH</i>           | Xanthine dehydrogenase                           | -1.7   | 0.00775    |
| <i>XK</i>            | X-linked Kx blood group                          | 2.029  | 0.00066    |
| <i>XPO1</i>          | Exportin 1                                       | -1.963 | 8.06E-08   |
| <i>YBX2</i>          | Y-box binding protein 2                          | -1.595 | 0.00468    |
| <i>ZBTB42</i>        | Zinc finger and BTB domain containing 42         | -1.644 | 0.00484    |
| <i>Zcchc13</i>       | Zinc finger, CCHC domain containing 13           | 3.435  | 0.00000411 |
| <i>ZCCHC7</i>        | Zinc finger CCHC-type containing 7               | -1.521 | 0.000731   |
| <i>ZDHHC14</i>       | Zinc finger DHHC-type containing 14              | 1.679  | 0.000152   |
| <i>ZMYND15</i>       | Zinc finger MYND-type containing 15              | 1.562  | 0.01       |
| <b><i>ZNF106</i></b> | Zinc finger protein 106                          | 1.879  | 0.0051     |
| <i>ZNF217</i>        | Zinc finger protein 217                          | -1.596 | 0.00962    |
| <i>ZNF277</i>        | Zinc finger protein 277                          | -1.662 | 0.0137     |
| <i>ZNF280C</i>       | Zinc finger protein 280C                         | -1.865 | 0.00182    |
| <i>ZNF365</i>        | Zinc finger protein 365                          | 1.954  | 0.02       |
| <i>ZNF385B</i>       | Zinc finger protein 385B                         | -3.665 | 0.00277    |
| <i>ZNF713</i>        | Zinc finger protein 713                          | -1.644 | 0.022      |

<sup>1</sup> Genes highlighted in bold were also differentially expressed in subcutaneous adipose of bull calves fed enhanced diet during early life in English et al. (2018). All genes highlighted followed the same direction of change the current study and that of English et al. (2018), with the exception of *IFIT3*, *KIAA0408*, *PRR5L*, *PSPH*, *SLC29A2*, *SMTNL2*, *TSPAN7* and *WISP2* which followed different direction of effect between the two studies.

<sup>2</sup>fold changes are up or down in High dietary group (HI) compared to Moderate dietary group (MOD)

**Supplementary Table 2:** Biochemical pathways significantly enriched in visceral adipose of heifer calves offered either a High plane of nutrition or a Moderate plane of nutrition for the first 21 weeks of life.

| Pathway name                                      | adj. p-value | Genes                                                                                                                                                                                                                                                                                                                                                        |
|---------------------------------------------------|--------------|--------------------------------------------------------------------------------------------------------------------------------------------------------------------------------------------------------------------------------------------------------------------------------------------------------------------------------------------------------------|
| Oxidative Phosphorylation                         | 5.01E-21     | <i>NDUFA10, MT-CYB, COX7B, MT-ND5, COX7A1, UQCRI0, MT-ND3, NDUFA1, MT-CO3, MT-ND2, MT-ND1, NDUFA13, UQCR11, MT-ND4L, UQCRFS1, SDHC, MT-ND4, MT-ATP6, UQCRC1, MT-CO1, NDUFB3, SDHA, COX4I2, NDUFV1, NDUFA2, NDUFAB1, Cox6c, NDUFA4, NDUFS2, CYB5A, NDUFS3, NDUFS6, ATP5MF, MT-CO2</i>                                                                         |
| Mitochondrial Dysfunction                         | 2E-19        | <i>NDUFA10, MT-CYB, COX7B, MT-ND5, COX7A1, UQCRI0, MT-ND3, NDUFA1, MT-CO3, MT-ND2, PRDX3, MT-ND1, NDUFA13, TXN2, UQCR11, MT-ND4L, UQCRFS1, TXNRD2, SDHC, MT-ND4, MT-ATP6, UQCRC1, MT-CO1, NDUFB3, SDHA, COX4I2, NDUFV1, NDUFA2, PDHA1, NDUFAB1, Cox6c, SOD2, NDUFA4, NDUFS2, CYB5A, NDUFS3, NDUFS6, ATP5MF, MT-CO2, XDH</i>                                  |
| Sirtuin Signaling Pathway                         | 5.01E-15     | <i>NDUFA10, MT-CYB, MT-ND5, AKT1, PGAM1, ACSS2, GOT2, MT-ND3, NDUFA1, NQO1, MT-ND2, MT-ND1, NDUFA13, TIMM23, ARNTL, MT-ND4L, UQCRFS1, PCK1, SDHC, MT-ND4, MT-ATP6, G6PD, NDUFB3, SOD1, SDHA, MAP1LC3A, NDUFV1, NDUFA2, PDHA1, NDUFAB1, HIST1H4J, SOD2, NDUFA4, NDUFS2, MYC, NDUFS3, LDHC, SIRT3, SLC25A4, HIF1A, ACLY, TUBA1B, Tomm5, LDHD, NDUFS6, LDHB</i> |
| Gluconeogenesis I                                 | 6.61E-05     | <i>PGAM1, ENO4, ALDOC, ME1, FBP1, ALDOA, GPI</i>                                                                                                                                                                                                                                                                                                             |
| STAT3 Pathway                                     | 0.000112     | <i>FGFR3, SRC, IL1B, VEGFA, MRAS, IL20RA, CDC25A, IL2RA, IL6R, INSR, SOCS2, CISH, IGF1, NDUFA13, MYC, SOCS1</i>                                                                                                                                                                                                                                              |
| Superoxide Radicals Degradation                   | 0.000178     | <i>SOD2, SOD1, TYRPI, NQO1</i>                                                                                                                                                                                                                                                                                                                               |
| Glutathione-mediated Detoxification               | 0.000275     | <i>GSTM4, GSTA4, MGST2, GSTA1, Gstt3, Gstt1, MGST1</i>                                                                                                                                                                                                                                                                                                       |
| Glycolysis I                                      | 0.000562     | <i>PGAM1, ENO4, ALDOC, FBP1, ALDOA, GPI</i>                                                                                                                                                                                                                                                                                                                  |
| Valine Degradation I                              | 0.000646     | <i>SDS, HIBADH, ACADSB, ABAT, ECHS1</i>                                                                                                                                                                                                                                                                                                                      |
| NRF2-mediated Oxidative Stress Response           | 0.000759     | <i>FGFR3, DNAJC6, IRS2, AKT1, MRAS, SOD1, MGST2, NQO1, PRDX1, MGST1, DNAJB5, MAFF, AKR7A2, SOD2, CDC34, GSTM4, GSTA4, GSTA1, MAP2K6</i>                                                                                                                                                                                                                      |
| Pentose Phosphate Pathway                         | 0.000759     | <i>TKT, PGD, G6PD, TALDO1</i>                                                                                                                                                                                                                                                                                                                                |
| Aryl Hydrocarbon Receptor Signaling               | 0.000813     | <i>SRC, IL1B, CCND2, ALDH18A1, MGST2, NQO1, MGST1, ALDH4A1, MYC, ALDH2, GSTM4, GSTA4, GSTA1, CTSD, ESR1</i>                                                                                                                                                                                                                                                  |
| Acute Phase Response Signaling                    | 0.001047     | <i>ITIH4, TF, IL1B, AKT1, SERPINF1, MRAS, ITIH3, IL6R, SOCS2, CRABP2, NFKBIA, SOD2, C2, ORM1, HMOX2, SOCS1, MAP2K6</i>                                                                                                                                                                                                                                       |
| Glycine Degradation (Creatine Biosynthesis)       | 0.001698     | <i>GAMT, GATM</i>                                                                                                                                                                                                                                                                                                                                            |
| Fatty Acid $\beta$ -oxidation I                   | 0.001778     | <i>SDS, ACSBG1, HADH, SLC27A3, IVD, ECHS1</i>                                                                                                                                                                                                                                                                                                                |
| Isoleucine Degradation I                          | 0.002089     | <i>SDS, ACADSB, ACAT2, ECHS1</i>                                                                                                                                                                                                                                                                                                                             |
| Phenylalanine Degradation IV (Mammalian, via Side | 0.002089     | <i>GOT2, ALDH2, HPD, SLC27A3</i>                                                                                                                                                                                                                                                                                                                             |

|                                                           |          |                                                                                                                        |
|-----------------------------------------------------------|----------|------------------------------------------------------------------------------------------------------------------------|
| Chain)                                                    |          |                                                                                                                        |
| Estrogen-Dependent Breast Cancer Signaling                | 0.003162 | <i>FGFR3, HSD17B14, SRC, IRS2, AKT1, MRAS, HSD17B12, HSD17B11, ESRI, IGF1</i>                                          |
| CDP-diacylglycerol Biosynthesis I                         | 0.003162 | <i>AGPAT2, CDS1, LPCAT3, GPAM, LPCAT2</i>                                                                              |
| LXR/RXR Activation                                        | 0.004365 | <i>ITIH4, TF, IL1B, ORM1, SCD, CLU, SERPINF1, PTGS2, FASN, HADH, LCAT, ECHS1</i>                                       |
| Phosphatidylglycerol Biosynthesis II (Non-plastidic)      | 0.004571 | <i>AGPAT2, CDS1, LPCAT3, GPAM, LPCAT2</i>                                                                              |
| Sucrose Degradation V (Mammalian)                         | 0.004898 | <i>KHK, ALDOC, ALDOA</i>                                                                                               |
| 4-hydroxyproline Degradation I                            | 0.005012 | <i>GOT2, ALDH4A1</i>                                                                                                   |
| 14-3-3-mediated Signaling                                 | 0.005129 | <i>FGFR3, PLCD1, SRC, IRS2, AKT1, TUBB, MRAS, TUBB6, TUBB4B, VIM, TUBA1B, PLCH2, MAPT</i>                              |
| Superpathway of Cholesterol Biosynthesis                  | 0.00537  | <i>LSS, NSDHL, DHCR24, IDI1, ACAT2</i>                                                                                 |
| Ketolysis                                                 | 0.006761 | <i>ACAT2, BDH1, OXCT1</i>                                                                                              |
| Intrinsic Prothrombin Activation Pathway                  | 0.007244 | <i>COL5A3, COL1A2, COL1A1, F13A1, KLK7, COL11A2</i>                                                                    |
| Dendritic Cell Maturation                                 | 0.007586 | <i>FGFR3, PLCD1, IRS2, IL1B, AKT1, CD1A, COL5A3, COL1A2, COL1A1, NFKBIA, IL23A, IRF8, HLA-DMB, PLCH2, LEP, COL11A2</i> |
| The Visual Cycle                                          | 0.008318 | <i>DHRS3, AKR1C3, LRAT, RDH10</i>                                                                                      |
| TR/RXR Activation                                         | 0.008318 | <i>FGFR3, AKR1C3, THRSP, IRS2, AKT1, HIF1A, FASN, ME1, PCK1, THR8</i>                                                  |
| Stearate Biosynthesis I (Animals)                         | 0.00912  | <i>ELOVL1, DHCR24, PPT1, ACSBG1, FASN, SLC27A3</i>                                                                     |
| Pentose Phosphate Pathway (Oxidative Branch)              | 0.009772 | <i>PGD, G6PD</i>                                                                                                       |
| Phenylethylamine Degradation I                            | 0.009772 | <i>ALDH2, AOC2</i>                                                                                                     |
| Adipogenesis pathway                                      | 0.009772 | <i>AGPAT2, FGFR3, ARNTL, FGF1, TXNIP, AKT1, HIF1A, PER2, PPIP5K1, KLF5, LEP, GTF2H5</i>                                |
| GP6 Signaling Pathway                                     | 0.010233 | <i>FGFR3, LAMC2, IRS2, AKT1, COL20A1, LAMB1, COL5A3, COL1A2, COL22A1, COL1A1, COL11A2, RASGRP2</i>                     |
| Hepatic Fibrosis / Hepatic Stellate Cell Activation       | 0.010715 | <i>FGF1, IL1B, VEGFA, PGF, IL6R, COL5A3, COL1A2, COL22A1, COL1A1, IGF1, VCAM1, TIMP2, COL20A1, LEP, COL11A2</i>        |
| IL-6 Signaling                                            | 0.010965 | <i>FGFR3, IRS2, IL1B, AKT1, VEGFA, TNFAIP6, MRAS, IL6R, SOCS1, COL1A1, MAP2K6, NFKBIA</i>                              |
| Role of JAK2 in Hormone-like Cytokine Signaling           | 0.012303 | <i>IRS2, SOCS1, SOCS2, SIRPA, SH2B2</i>                                                                                |
| Ethanol Degradation II                                    | 0.012303 | <i>ACSS2, ALDH2, ADH6, ADHFE1, ALDH4A1</i>                                                                             |
| Triacylglycerol Biosynthesis                              | 0.012303 | <i>AGPAT2, ELOVL1, LPCAT3, GPAM, LPCAT2, DGAT2</i>                                                                     |
| Cholesterol Biosynthesis I                                | 0.014791 | <i>LSS, NSDHL, DHCR24</i>                                                                                              |
| Cholesterol Biosynthesis II (via 24,25-dihydrolanosterol) | 0.014791 | <i>LSS, NSDHL, DHCR24</i>                                                                                              |
| Cholesterol Biosynthesis III (via Desmosterol)            | 0.014791 | <i>LSS, NSDHL, DHCR24</i>                                                                                              |
| FXR/RXR Activation                                        | 0.015488 | <i>ITIH4, TF, IL1B, AKT1, ORM1, CLU, SERPINF1, VLDLR, FASN, LCAT, FBP1</i>                                             |
| HIF1 $\alpha$ Signaling                                   | 0.015488 | <i>MMP25, FGFR3, IRS2, AKT1, LDHC, VEGFA, MRAS, HIF1A, PGF, MMP15, LDHB</i>                                            |
| Bladder Cancer Signaling                                  | 0.015849 | <i>MMP25, FGFR3, MYC, FGF1, VEGFA, MRAS, PGF, ERBB2, MMP15</i>                                                         |

|                                                |          |                                                                                                                                                                                                                                 |
|------------------------------------------------|----------|---------------------------------------------------------------------------------------------------------------------------------------------------------------------------------------------------------------------------------|
| Serine Biosynthesis                            | 0.015849 | <i>PSPH, DUSP26</i>                                                                                                                                                                                                             |
| Citrulline-Nitric Oxide Cycle                  | 0.015849 | <i>ASS1, ASL</i>                                                                                                                                                                                                                |
| Folate Polyglutamylation                       | 0.015849 | <i>MTHFD1, FPGS</i>                                                                                                                                                                                                             |
| Glutathione Redox Reactions I                  | 0.015849 | <i>MGST2, GSTA1, Gstt1, MGST1</i>                                                                                                                                                                                               |
| TCA Cycle II (Eukaryotic)                      | 0.015849 | <i>IDH3B, FH, SDHA, SDHC</i>                                                                                                                                                                                                    |
| Axonal Guidance Signaling                      | 0.015849 | <i>MMP25, AKT1, MRAS, TUBB6, PGF, ADAMTS16, ADAMTS2, RGS3, WNT11, ENPEP, KIF7, ADAMTS17, NTN5, ADAM11, ERBB2, MMP15, NCK1, KALRN, ADAM9, FGFR3, ROBO2, PLCD1, IRS2, VEGFA, TUBB, ROBO1, ADAM19, IGF1, TUBB4B, TUBA1B, PLCH2</i> |
| Atherosclerosis Signaling                      | 0.017378 | <i>IL1B, ORM1, CLU, COL5A3, COL1A2, LCAT, COL1A1, TNFRSF12A, COL11A2, PLA2G5, VCAM1</i>                                                                                                                                         |
| Androgen Biosynthesis                          | 0.018197 | <i>HSD17B14, SRD5A1, AKR1C3</i>                                                                                                                                                                                                 |
| Ethanol Degradation IV                         | 0.018197 | <i>ACSS2, ALDH2, TYRP1, ALDH4A1</i>                                                                                                                                                                                             |
| AMPK Signaling                                 | 0.019953 | <i>FGFR3, SRC, IRS2, AKT1, PFKFB2, MRAS, FASN, INSR, CHRNA3, GYS2, EEF2K, AK2, RAB3A, CPT2, LEP, AK5</i>                                                                                                                        |
| Apelin Liver Signaling Pathway                 | 0.020893 | <i>COL5A3, COL1A2, COL1A1, COL11A2</i>                                                                                                                                                                                          |
| Integrin Signaling                             | 0.021878 | <i>FGFR3, SRC, IRS2, AKT1, MRAS, ITGAE, TSPAN4, TSPAN7, TLN2, ITGA7, GRB7, CAPN3, GSN, RHOB, TTN, NCK1</i>                                                                                                                      |
| Superpathway of Citrulline Metabolism          | 0.021878 | <i>ASS1, ALDH18A1, ASL</i>                                                                                                                                                                                                      |
| Arginine Biosynthesis IV                       | 0.022909 | <i>ASS1, ASL</i>                                                                                                                                                                                                                |
| Pyruvate Fermentation to Lactate               | 0.022909 | <i>LDHC, LDHB</i>                                                                                                                                                                                                               |
| Urea Cycle                                     | 0.022909 | <i>ASS1, ASL</i>                                                                                                                                                                                                                |
| Glycogen Biosynthesis II (from UDP-D-Glucose)  | 0.022909 | <i>GYG2, GYS2</i>                                                                                                                                                                                                               |
| Rapoport-Luebering Glycolytic Shunt            | 0.022909 | <i>PGAM1, TIGAR</i>                                                                                                                                                                                                             |
| GDP-mannose Biosynthesis                       | 0.022909 | <i>GMPPB, GPI</i>                                                                                                                                                                                                               |
| LPS/IL-1 Mediated Inhibition of RXR Function   | 0.023442 | <i>IL1B, ALDH18A1, MGST2, MGST1, ALDH4A1, XPO1, ACOX1, SULT1C4, ACSBG1, ACOX2, ALDH2, GSTM4, CPT2, GSTA4, SLC27A3, GSTA1</i>                                                                                                    |
| Angiopietin Signaling                          | 0.025704 | <i>FGFR3, ANGPT2, IRS2, AKT1, MRAS, NFKBIA, NCK1, GRB7</i>                                                                                                                                                                      |
| Glutaryl-CoA Degradation                       | 0.026303 | <i>ACAT2, HADH, HACD2</i>                                                                                                                                                                                                       |
| Gap Junction Signaling                         | 0.026303 | <i>FGFR3, PLCD1, SRC, IRS2, AKT1, NPRI, TUBB, GJC2, MRAS, TUBB6, GRIK2, GUCY2D, TUBB4B, TUBA1B, PLCH2</i>                                                                                                                       |
| Type II Diabetes Mellitus Signaling            | 0.027542 | <i>FGFR3, IRS2, AKT1, ACSBG1, KCNJ11, CACNA1G, INSR, ABCC8, SOCS1, SOCS2, SLC27A3, NFKBIA</i>                                                                                                                                   |
| Retinol Biosynthesis                           | 0.02884  | <i>DHRS3, DDHD2, AKR1C3, LRAT, RDH10</i>                                                                                                                                                                                        |
| T Helper Cell Differentiation                  | 0.030903 | <i>BCL6, FOXP3, HLA-DMB, IL2RA, STAT6, IL6R, RORC</i>                                                                                                                                                                           |
| $\gamma$ -linolenate Biosynthesis II (Animals) | 0.030903 | <i>CYB5A, ACSBG1, SLC27A3</i>                                                                                                                                                                                                   |

|                                                   |          |                                                                                                                        |
|---------------------------------------------------|----------|------------------------------------------------------------------------------------------------------------------------|
| Mitochondrial L-carnitine Shuttle Pathway         | 0.030903 | <i>ACSBG1, CPT2, SLC27A3</i>                                                                                           |
| Superpathway of Serine and Glycine Biosynthesis I | 0.030903 | <i>PSPH, DUSP26</i>                                                                                                    |
| Ceramide Biosynthesis                             | 0.030903 | <i>SPTLC3, KDSR</i>                                                                                                    |
| Pentose Phosphate Pathway (Non-oxidative Branch)  | 0.030903 | <i>TKT, TALDO1</i>                                                                                                     |
| Endocannabinoid Cancer Inhibition Pathway         | 0.031623 | <i>FGFR3, VIM, MYC, SRC, IRS2, AKT1, CCND2, VEGFA, HIF1A, PGF, TWIST2, MAP2K6</i>                                      |
| Renal Cell Carcinoma Signaling                    | 0.032359 | <i>FGFR3, IRS2, AKT1, FH, VEGFA, MRAS, HIF1A, UBC</i>                                                                  |
| Pyrimidine Ribonucleotides Interconversion        | 0.034674 | <i>HNRNPA1, SMARCA1, AK5, PCK1, ENTPD2</i>                                                                             |
| JAK/Stat Signaling                                | 0.034674 | <i>FGFR3, IRS2, AKT1, MRAS, STAT6, SOCS1, SOCS2, CISH</i>                                                              |
| Superpathway of Inositol Phosphate Compounds      | 0.038019 | <i>DUSP10, FGFR3, PLCD1, SRC, IRS2, CDC25A, EPHX2, PDXP, INPP5K, ERBB2, PLCH2, HACD2, PPIP5K1, ITPKC, SIRPA, PPP5C</i> |
| Pyrimidine Ribonucleotides De Novo Biosynthesis   | 0.040738 | <i>HNRNPA1, SMARCA1, AK5, PCK1, ENTPD2</i>                                                                             |
| VEGF Signaling                                    | 0.040738 | <i>FGFR3, SRC, IRS2, AKT1, VEGFA, MRAS, HIF1A, PGF, EIF2B2</i>                                                         |
| Acetyl-CoA Biosynthesis III (from Citrate)        | 0.041687 | <i>ACLY</i>                                                                                                            |
| Sorbitol Degradation I                            | 0.041687 | <i>SORD</i>                                                                                                            |
| Methylglyoxal Degradation VI                      | 0.041687 | <i>LDHD</i>                                                                                                            |
| Histamine Biosynthesis                            | 0.041687 | <i>HDC</i>                                                                                                             |
| Lanosterol Biosynthesis                           | 0.041687 | <i>LSS</i>                                                                                                             |
| Insulin Receptor Signaling                        | 0.041687 | <i>FGFR3, IRS2, AKT1, SGK1, INPP5K, MRAS, ACLY, INSR, EIF2B2, NCK1, GYS2</i>                                           |
| PEDF Signaling                                    | 0.042658 | <i>FGFR3, SOD2, IRS2, AKT1, SERPINF1, MRAS, NFKBIA, ARHGAP22</i>                                                       |
| IL-4 Signaling                                    | 0.045709 | <i>FGFR3, IRS2, AKT1, INPP5K, MRAS, HLA-DMB, STAT6, SOCS1</i>                                                          |
| Circadian Rhythm Signaling                        | 0.045709 | <i>ARNTL, VIPR2, PER1, PER2</i>                                                                                        |



**Supplementary Table 3:** Biochemical networks generated within Ingenuity Pathway Analysis (IPA) from genes differentially expressed in visceral adipose of heifer calves offered either a High plane of nutrition or a Moderate plane of nutrition for the first 21 weeks of life.

| Network number and function                                                | Genes                                                                                                                                                                                                                                                                                                                               | Score | Focus Molecules |
|----------------------------------------------------------------------------|-------------------------------------------------------------------------------------------------------------------------------------------------------------------------------------------------------------------------------------------------------------------------------------------------------------------------------------|-------|-----------------|
| 1. Developmental Disorder, Hereditary Disorder, Metabolic Disease          | <i>ASL, CCDC69, ECHDC2, EPDR1, ETFA, FBXO17, FUT1, GLT8D2, GRIK2, ISCU, IVD, MAATS1, MAPT, MT-ND1, MT-ND4, MT-ND5, NDUFA1, NDUFA10, NDUFA2, NDUFAB1, NDUFAF7, NDUFB3, NDUFS2, NDUFS3, NDUFS6, NDUFV1, OXCT1, PDSS1, Pka, PLIN5, PTGR1, SOD1, STXBP2, SUMO, TYRP1</i>                                                                | 48    | 33              |
| 2. Molecular Transport, Endocrine System                                   | <i>ACSF2, Alpha 1 antitrypsin, BOLA3, chymotrypsin, CLGN, CLIC6, ECH1, ESR1, FPGS, GLRX5, GMPPB, HDGFL3, HSF2BP, ISOC2, MPC2, MTERF2, MTMR12, NDUFAF5, NIT1, OGFOD3, PLXDC1, RAD51B, SAMD11, SCUBE2, SHROOM1, SLC25A20, SLC4A10, SLC4A11, SLC4A4/5/10/11, SLC4A5, SNN, SORD, THEM6, TTC9, XK</i>                                    | 45    | 32              |
| 3. Cell Cycle, Cell Morphology, Developmental Disorder                     | <i>ABHD12, ACSBG1, AES, CCDC8, CCDC92, CIRBP, Ck2, CRB1, DCLRE1B, EHBPI, FANCD2, GJC2, Gpm6b, HNRNPA1, INSR, Interferon alpha, ITM2C, KPNA2, MROH6, NAP1L5, NEK4, NMDA Receptor, PATJ, PIGS, PRDX1, Proinsulin, RIMKLB, RTL1, Shc, SLC22A23, Slc25a1, SLC5A6, Tdh, UBC, XPO1</i>                                                    | 40    | 30              |
| 4. Nucleic Acid Metabolism, Small Molecule Biochemistry, Cellular Movement | <i>AK2, AK5, APCDD1, C2, CENPX, ETS, FAAP100, FAP, FH, GAMT, GREB1, IDH3B, IMPA2, IRX3, ITGBL1, KCTD2, LMO1, LXN, MASP1, MYC, NDPK, NMNAT2, NRIP3, PRSS23, SCPEP1, SCUBE3, Serine Protease, Smad2/3, Smad2/3-Smad4, SRD5A1, Steroid 5 alpha-Reductase, TAF1D, TKT, TSPAN7, ZNF217</i>                                               | 38    | 29              |
| 5. Amino Acid Metabolism, Small Molecule Biochemistry, Cancer              | <i>AKAP4, ANP32A, ARHGAP22, BPHL, C1q, CALR3, DDAH2, DENND2D, DNA-methyltransferase, DOCK8, EGLN, FAT1, GPI, HDC, HIST2H4A, HISTONE, HOMER1, IFIT3, LZTFL1, MERTK, MSRA, NAB2, PARP, PARP3, PLA1A, RNASEH2A, RNF125, SAMSNI, SSR3, TCF23, TMEM107, TRIP13, TTC19, Vegf, YBX2</i>                                                    | 38    | 29              |
| 6. Cellular Compromise, Inflammatory Response, Neurological Disease        | <i>ABCB6, ACADS, BNIP3, CHAC2, CHI3L1, CORO2A, CRAT, DDHD2, DKK3, ENPEP, FCN1, Ferritin, GSDMB, HBD, HDL, hemoglobin, Iti, ITIH3, ITIH4, LCAT, LRRC8E, MAP1LC3, MLF1, NFKBIA, NT5DC1, ORM1, PIR, PROZ, PTX3, RGS3, SERPINB1, SPINT2, TF, TNFAIP6, VLDL-cholesterol</i>                                                              | 38    | 29              |
| 7. Cellular Assembly and Organization, , Organ Development                 | <i>14-3-3, alcohol group acceptor phosphotransferase, Alpha Actinin, ATL2, ATP2B2, BCAP31, CACNA1G, Calmodulin, CAMK1G, CCND2, CD81, CDK18, DMPK, DMTN, F Actin, HIST1H2BO, Hsp90, KLF5, MAGED2, MAP1LC3A, MAP2K6, MDM1, SERINC2, SORCS2, SYNPO2, TMBIM6, TMEM160, TP53INP2, TSPAN4, TUBA1B, TUBB, TUBB4B, TUBB6, tubulin, WFS1</i> | 36    | 28              |
| 8. Developmental Disorder, Hereditary Disorder, Metabolic Disease          | <i>ABCC8, BDH1, cAMP-dependent protein kinase, CISD1, CMC2, COA3, COQ9, COX4I2, COX7B, cytochrome C, DHCR24, ETFDH, FUNDC2, HINT3, HPD, Mpt pore, MT-CO2, MT-CO3, NADH dehydrogenase, NDUFA13, NDUFA4, P2RX4, P2RX6, P38 MAPK, PFKFB2, POLDIP2, RIDA, Ryr, RYR1, SERCA, SLC25A4, TIMM23, TNFRSF6B, Tomm5, tubulin (family)</i>      | 34    | 27              |
| 9. Carbohydrate Metabolism, Small Molecule Biochemistry, Cell Morphology   | <i>ACAT2, AKT1, ALDOA, ALDOC, ASB2, ATP5MF, ATP6V1E1, CGNL1, CRYZ, ENaC, GATM, Glycogen synthase, GYG2, GYS2, HADH, KCNMB1, KCNMB4, LSS, MAGIX, MRAS, MTA3, NCAPH, NCK, NCK1, Nuclear factor 1, Pak, PDGF-AA, PGD, Rab5, RASGRP2, Rho gdi, SH2B2, Troponin t, VAV3, WNK4</i>                                                        | 32    | 26              |

|                                                                                               |                                                                                                                                                                                                                                                                                                                                                                       |    |    |
|-----------------------------------------------------------------------------------------------|-----------------------------------------------------------------------------------------------------------------------------------------------------------------------------------------------------------------------------------------------------------------------------------------------------------------------------------------------------------------------|----|----|
| 10. Post-Translational Modification, Cell Morphology, Cellular Movement                       | <i>AKAP12, BAIAP2L1, Cdc2, CG, COA7, DUSP10, DUSP22, DUSP26, DUSP4, EPB41LAB, EPM2A, FSH, ion channel, IRS2, Lh, MAMLD1, Mapk, MEGF10, MOSPD1, PARD6B, Pde, PDE5A, PDF, Pka catalytic subunit, PTPase, PTPRD, PTPRS, ROBO1, ROBO2, SGTB, SIRPA, SMTNL2, TDRD5, TLN2, tyrosine kinase</i>                                                                              | 30 | 25 |
| 11. Cancer, Organismal Injury and Abnormalities, Carbohydrate Metabolism                      | <i>Actin, ADAM11, ADAM19, ADAMTS16, ADAMTS17, Alpha catenin, ANKRD35, BUD23, COX7A1, CSDC2, CXCL2, ERBB2, estrogen receptor, FBXO40, GSN, Integrin, IVNS1ABP, KIAA0408, LEP, LSR, Metalloprotease, Mmp, OGA, OGT, p85 (pik3r), PKNOX1, Rap1, RNA polymerase II, Rnr, SH3GL2, THRB, TNFRSF12A, VIM, ZNF106, ZNF280C</i>                                                | 30 | 25 |
| 12. Small Molecular Biochemistry, Metabolic Processes                                         | <i>ABAT, ASGR1, COX20, Cytochrome bc1, cytochrome-c oxidase, ERK, FOXRED1, GK, Hif1, LDH (family), LDHB, LDHC, LDHD, MAP7, Mitochondrial complex 1, MT-ATP6, MT-CYB, MT-ND2, MT-ND3, MT-ND4L, Oas, Oxphos, PRDX3, RASD1, S100, SDHC, SIRT3, SMAD1/5, SULF1, Thioredoxin reductase, TXNRD2, UQCRI0, UQCRI1, UQCRC1, UQCRC5</i>                                         | 28 | 24 |
| 13. Cell-To-Cell Signaling and Interaction, Protein Synthesis                                 | <i>aldo, ASB16, ASB9, calpain, CAST, Cathepsin, CKB, creatine kinase, CTSD, CTSO, DPYSL3, ENO4, Enolase, Gap, Has, HCN2, HIST1H2BN, ITGA7, KIZ, Lysosomal Protease, MREG, NCS1, PFKFB, PGAM1, PHKA2, phosphatidylinositol-4,5-bisphosphate 3-kinase, PRUNE2, RAB3A, RASAL1, RCN3, RETSAT, SGCA, SRC, SYN2, Villin</i>                                                 | 28 | 24 |
| 14. Carbohydrate Metabolism, Nucleic Acid Metabolism, Small Molecule Biochemistry             | <i>ABCA7, ABCD1, ACAC, ANP32B, Ap2, ARHGEF37, ASMTL, ASS1, ATPase, BIN3, C/EBP, CSPG4, cytokine, DLX5, DQX1, EFS, ENTPD2, G6PD, HIST1H4J, HOXC8, Integrin alpha 4 beta 1, INTERLEUKIN, KCNK2, LDL-cholesterol, LIPA, MOG, nucleoside-triphosphatase, RNF128, SAA, SERPINF1, SMARCA1, SORT1, Sphk, TALDO1, VCAM1</i>                                                   | 28 | 24 |
| 15. Hereditary Disorder, Organismal Injury and Abnormalities, Skeletal and Muscular Disorders | <i>ADTRP, ALDH, ALDH18A1, ALDH2, ALDH4A1, Angiotensin II receptor type 1, ANGPT2, BETA TUBULIN, Calcineurin protein(s), CaMKII, CDC34, CLMN, CRYAB, DNAJ, DNAJB5, FHL1, GUCY, GUCY2D, KALRN, KCNJ11, KIF1C, MYO1A, NADK, NFAT (complex), Nfat (family), NPR1, PITPNM1, Pp2b, PSPH, PVALB, Rac, S100B, SPTLC3, THBS2, TTN</i>                                          | 28 | 24 |
| 16. Lipid Metabolism, Small Molecule Biochemistry, Nucleic Acid Metabolism                    | <i>20s proteasome, ACLY, ACSS2, AMIGO3, AURK, Calcineurin A, CDC25A, Cdk, Cyclin B, EEF2K, ELOVL1, EPHX2, Ga12/13, HACD2, HSD17B, HSD17B11, HSD17B12, HSD17B14, IGF1, KLHL25, MSI2, Pdgf (complex), PDXP, PHLDB3, phosphatase, Pp2c, PPIP5K1, PPP5C, pyruvate kinase, RNF157, SESN1, SNCG, Srebp, TECR, TIGAR</i>                                                     | 26 | 23 |
| 17. Cellular Assembly and Organization, Cell Cycle, Developmental Disorder                    | <i>Akt, Caveolin, CNTN1, Cox6c, Dynammin, EIF2B2, FKHR, GOT2, GSS, HEY1, IRS, LETM1, LRAT, MARCH2, MT-CO1, MYADM, N-type Calcium Channel, NMB, NOSTRIN, Notch, Nradd, PARM1, Pde4, PDGF-DD, PGF, PLP2, Presenilin, Secretase gamma, SLC16A1, STX12, STX17, Syntaxin, SYT17, VAMP8, Vegf Receptor</i>                                                                  | 25 | 22 |
| 18. Drug Metabolism, Protein Synthesis, Glutathione Depletion In Liver                        | <i>Adaptor protein 1, AIFM3, Aldose Reductase, CLU, CYP4V2, DBI, glutathione peroxidase, glutathione transferase, Glutathione-S-transferase, GST, Gst alpha, GSTA1, GSTA4, GSTM4, Gstt1, Gstt3, Gulo, HDL-cholesterol, HSPB6, Jnk, KLF11, Ldh (complex), MGST1, MGST2, OSBP2, PRNP, RASSF7, RBM47, Sod, SOD2, succinate dehydrogenase, TARSL2, TENM3, VLDL, VLDLR</i> | 25 | 22 |
| 19. Connective Tissue Disorders, Organismal Injury and                                        | <i>ADAMTS2, CHPT1, COL11A2, COL5A3, Collagen type I, Collagen type II, Collagen type III, Collagen type IV, CX3CLI, Eotaxin, F13A1, Fibrin, GPC1, GPIIB-IIIa, HABP4, Integrin alpha V beta 3, KCNC3,</i>                                                                                                                                                              | 25 | 22 |

|                                                                                             |                                                                                                                                                                                                                                                                                                                                                           |    |    |
|---------------------------------------------------------------------------------------------|-----------------------------------------------------------------------------------------------------------------------------------------------------------------------------------------------------------------------------------------------------------------------------------------------------------------------------------------------------------|----|----|
| Abnormalities, Amino Acid Metabolism                                                        | <i>KCNC4, LAMB1, LAMC2, Laminin (complex), Laminin (family), Pkc(s), PLCD1, PLOD2, PMEPA1, Rab11, RGN, SLC1A1, SLC38A3, SLC6A9, Smad, SOX17, SSC5D, THY1</i>                                                                                                                                                                                              |    |    |
| 20.Connective Tissue Disorders, Organismal Injury and Abnormalities, Developmental Disorder | <i>ASGR2, CA10, CA11, CA4, Carbonic anhydrase, COL1A1, COL1A2, COL20A1, COL22A1, collagen, Collagen Alpha1, Collagen(s), ECHS1, Ecm, farnesyl transferase, FKRP, FNTB, JINK1/2, Kallikrein, LARP6, MMP15, MMP25, Mt-mmp, MTHFD1, Pdgf Ab, RAS, SLC4A4, SPARC, SRCIN1, Tgf beta, TGM3, TGM5, TIMP2, transglutaminase, UBXN11</i>                           | 25 | 22 |
| 21.Lipid Metabolism, Small Molecule Biochemistry, Neurological Disease                      | <i>C2CD2, CAMK2N1, CCDC58, CX3CR1, ELAVL1, ELOVL1, FBXO8, FN3K, GLP1R, GLTP, GPR180, GSS, HACD2, ISOC1, KAZN, KDSR, LEPROT, LPAR3, MOB3B, MPV17L, MTFMT, PLEKHB1, PRPS2, PTEN, SETD9, SLC39A13, SLC46A3, SLC50A1, SPTSSA, SRD5A1, TCF7L2, TENT4A, TLNRD1, TMEM163, ZCCHC7</i>                                                                             | 25 | 22 |
| 22.Lipid Metabolism, Molecular Transport, Small Molecule Biochemistry                       | <i>1-acylglycerol-3-phosphate O-acyltransferase, Aconitase, AGPAT2, C8, CCDC3, CD3 group, CPT1, CPT2, CSRNP1, CYB5A, CYP, CYP19, DGAT2, DUB, elastase, GM2A, GOT, IL1B, Inflammasome (Nalp3, Asc, Casp1), ITM2B, LPCAT2, LPCAT3, MAC, MCUR1, METRNL, MFAP2, MGP, MIR124, PCYT2, RARRES2, RNASE1, SCD, SINHCAF, SLC25A25, Thrombospondin</i>               | 23 | 21 |
| 23.Gene Expression, Cell Morphology, Hematopoiesis                                          | <i>Chp/p300, CCDC85C, CDC42EP4, CEP89, DNA-directed RNA polymerase, DYNLRB2, ELL3, Gsk3, GTF2H5, Hat, HMGB2, Holo RNA polymerase II, IFN alpha/beta, IFN Beta, IFN type 1, Ifnar, Ikk (family), IRAK, IRF, IRF8, KIF7, MAT2A, POLR2E, POLR3G, POLR3H, POLR3K, PPP1R2, SEPT6, SH3BGR2, SNAPC1, SNAPC5, TH1 Cytokine, Tlr, TLR8, TRAF3IP2</i>               | 23 | 21 |
| 24.Lipid Metabolism, Nucleic Acid Metabolism, Small Molecule Biochemistry                   | <i>26s Proteasome, ADRB, AKR7A2, AMPK, Ap1, ARRDC2, DDIT4, EIF4G1, FASN, HIF1A, HIST1H2AC, Hsp27, IL-1R, LAMTOR1, MTORC1, NQO1, ORC1, p70 S6k, PDGF BB, PDHA1, PDZRN3, PEBP1, PI3K (family), PLA2, Pld, PPT1, Ras homolog, SDHA, SLC1A5, TBKBP1, TXN2, TXNIP, Ubiquitin, UCHL1, UCHL3</i>                                                                 | 23 | 21 |
| 25.Cell Signaling, Nucleic Acid Metabolism, Cell-To-Cell Signaling and Interaction          | <i>ACKR3, ADCY, Beta Arrestin, CDS1, CERS6, Clathrin, CX3CR1, Endothelin, FFAR4, G protein, G protein beta gamma, G-protein beta, Gpcr, GPER1, GPR156, GPR21, GPR37, GPR37L1, GPRC5A, Gs-coupled receptor, HCAR3, HCRTR1, HMOX2, MCHR1, OPRL1, P110, P2RY2, protein phosphatase, Relaxin, Rgs, RGS1, S1PR3, Sfk, VIPR2, voltage-gated calcium channel</i> | 21 | 20 |

**Supplementary Table 4:** Genes identified as up-regulated in visceral adipose of heifer calves offered a High plane of nutrition compared to a Moderate plane of nutrition for the first 21 weeks of life and mapped in Ingenuity Pathway Analysis (IPA).

| Pathway name                                | adj. p-value | Genes                                                                                                                                                                                                                                                                                                                    |
|---------------------------------------------|--------------|--------------------------------------------------------------------------------------------------------------------------------------------------------------------------------------------------------------------------------------------------------------------------------------------------------------------------|
| Oxidative Phosphorylation                   | 3.98E-29     | <i>ATP5MF, COX4I2, Cox6c, COX7A1, COX7B, CYB5A, MT-ATP6, MT-CO1, MT-CO2, MT-CO3, MT-CYB, MT-ND1, MT-ND2, MT-ND3, MT-ND4, MT-ND4L, MT-ND5, NDUFA1, NDUFA10, NDUFA13, NDUFA2, NDUFA4, NDUFAB1, NDUFB3, NDUFS2, NDUFS3, NDUFS6, NDUFV1, SDHA, SDHC, UQCR10, UQCR11, UQCRC1, UQCRFS1</i>                                     |
| Mitochondrial Dysfunction                   | 1.58E-27     | <i>ATP5MF, COX4I2, Cox6c, COX7A1, COX7B, CYB5A, MT-ATP6, MT-CO1, MT-CO2, MT-CO3, MT-CYB, MT-ND1, MT-ND2, MT-ND3, MT-ND4, MT-ND4L, MT-ND5, NDUFA1, NDUFA10, NDUFA13, NDUFA2, NDUFA4, NDUFAB1, NDUFB3, NDUFS2, NDUFS3, NDUFS6, NDUFV1, PDHA1, PRDX3, SDHA, SDHC, SOD2, TXN2, TXNRD2, UQCR10, UQCR11, UQCRC1, UQCRFS1</i>   |
| Sirtuin Signaling Pathway                   | 1.58E-20     | <i>ACLY, ACSS2, ARNTL, G6PD, GOT2, LDHB, LDHC, LDHD, MAP1LC3A, MT-ATP6, MT-CYB, MT-ND1, MT-ND2, MT-ND3, MT-ND4, MT-ND4L, MT-ND5, NDUFA1, NDUFA10, NDUFA13, NDUFA2, NDUFA4, NDUFAB1, NDUFB3, NDUFS2, NDUFS3, NDUFS6, NDUFV1, NQO1, PCK1, PDHA1, PGAM1, SDHA, SDHC, SIRT3, SLC25A4, SOD1, SOD2, TIMM23, Tomm5, UQCRFS1</i> |
| Superoxide Radicals Degradation             | 1.86E-05     | <i>NQO1, SOD1, SOD2, TYRP1</i>                                                                                                                                                                                                                                                                                           |
| Pentose Phosphate Pathway                   | 5.37E-05     | <i>G6PD, PGD, TALDO1, TKT</i>                                                                                                                                                                                                                                                                                            |
| Valine Degradation I                        | 5.89E-05     | <i>ABAT, ACADSB, ECHS1, HIBADH, SDS</i>                                                                                                                                                                                                                                                                                  |
| Glutathione-mediated Detoxification         | 8.13E-05     | <i>GSTA1, GSTA4, GSTM4, Gstt1, Gstt3, MGST1</i>                                                                                                                                                                                                                                                                          |
| Xenobiotic Metabolism AHR Signaling Pathway | 0.000155     | <i>ALDH18A1, ALDH2, ALDH4A1, GSTA1, GSTA4, GSTM4, IL1B, MGST1, NQO1</i>                                                                                                                                                                                                                                                  |
| Gluconeogenesis I                           | 0.000288     | <i>ALDOA, ALDOC, GPI, ME1, PGAM1</i>                                                                                                                                                                                                                                                                                     |
| Isoleucine Degradation I                    | 0.000417     | <i>ACADSB, ACAT2, ECHS1, SDS</i>                                                                                                                                                                                                                                                                                         |
| NRF2-mediated Oxidative Stress Response     | 0.00049      | <i>AKR7A2, CDC34, DNAJB5, GSTA1, GSTA4, GSTM4, MAP2K6, MGST1, MRAS, NQO1, PRDX1, SOD1, SOD2</i>                                                                                                                                                                                                                          |
| Superpathway of Cholesterol Biosynthesis    | 0.00049      | <i>ACAT2, DHCR24, IDI1, LSS, NSDHL</i>                                                                                                                                                                                                                                                                                   |
| Aryl Hydrocarbon Receptor Signaling         | 0.000513     | <i>ALDH18A1, ALDH2, ALDH4A1, CTSD, ESR1, GSTA1, GSTA4, GSTM4, IL1B, MGST1, NQO1</i>                                                                                                                                                                                                                                      |
| Ethanol Degradation II                      | 0.000794     | <i>ACSS2, ADH6, ADHFE1, ALDH2, ALDH4A1</i>                                                                                                                                                                                                                                                                               |
| Fatty Acid $\beta$ -oxidation I             | 0.000794     | <i>ACSBG1, ECHS1, HADH, IVD, SDS</i>                                                                                                                                                                                                                                                                                     |
| Sucrose Degradation V (Mammalian)           | 0.000933     | <i>ALDOA, ALDOC, KHK</i>                                                                                                                                                                                                                                                                                                 |
| Ketolysis                                   | 0.001318     | <i>ACAT2, BDH1, OXCT1</i>                                                                                                                                                                                                                                                                                                |
| CDP-diacylglycerol Biosynthesis I           | 0.001514     | <i>AGPAT2, CDS1, GPAM, LPCAT2</i>                                                                                                                                                                                                                                                                                        |
| Ethanol Degradation IV                      | 0.001778     | <i>ACSS2, ALDH2, ALDH4A1, TYRP1</i>                                                                                                                                                                                                                                                                                      |

|                                                                           |          |                                                                                                     |
|---------------------------------------------------------------------------|----------|-----------------------------------------------------------------------------------------------------|
| LXR/RXR Activation                                                        | 0.002042 | <i>CLU, ECHS1, FASN, HADH, IL1B, ORM1, SCD, SERPINF1, TF</i>                                        |
| Phosphatidylglycerol Biosynthesis II (Non-plastidic)                      | 0.002089 | <i>AGPAT2, CDS1, GPAM, LPCAT2</i>                                                                   |
| TCA Cycle II (Eukaryotic)                                                 | 0.002089 | <i>FH, IDH3B, SDHA, SDHC</i>                                                                        |
| LPS/IL-1 Mediated Inhibition of RXR Function                              | 0.002399 | <i>ACOX1, ACOX2, ACSBG1, ALDH18A1, ALDH2, ALDH4A1, CPT2, CRAT, GSTA1, GSTA4, GSTM4, IL1B, MGST1</i> |
| Intrinsic Prothrombin Activation Pathway                                  | 0.002754 | <i>COL1A1, COL1A2, COL5A3, F13A1, KLK7</i>                                                          |
| Glycolysis I                                                              | 0.002818 | <i>ALDOA, ALDOC, GPI, PGAM1</i>                                                                     |
| Cholesterol Biosynthesis I                                                | 0.002951 | <i>DHCR24, LSS, NSDHL</i>                                                                           |
| Cholesterol Biosynthesis II (via 24, 25-dihydrolanosterol)                | 0.002951 | <i>DHCR24, LSS, NSDHL</i>                                                                           |
| Cholesterol Biosynthesis III (via Desmosterol)                            | 0.002951 | <i>DHCR24, LSS, NSDHL</i>                                                                           |
| Pentose Phosphate Pathway (Oxidative Branch)                              | 0.00309  | <i>G6PD, PGD</i>                                                                                    |
| Phenylethylamine Degradation I                                            | 0.00309  | <i>ALDH2, AOC2</i>                                                                                  |
| Phenylalanine Degradation IV (Mammalian, via Side Chain)                  | 0.003715 | <i>ALDH2, GOT2, HPD</i>                                                                             |
| Stearate Biosynthesis I (Animals)                                         | 0.00537  | <i>ACSBG1, DHCR24, FASN, PPT1, TECR</i>                                                             |
| Androgen Biosynthesis                                                     | 0.005495 | <i>GSTA1, HSD17B14, SRD5A1</i>                                                                      |
| Pyruvate Fermentation to Lactate                                          | 0.007586 | <i>LDHB, LDHC</i>                                                                                   |
| Ceramide Biosynthesis                                                     | 0.007586 | <i>KDSR, SPTLC3</i>                                                                                 |
| Pentose Phosphate Pathway (Non-oxidative Branch)                          | 0.007586 | <i>TALDO1, TKT</i>                                                                                  |
| Rapoport-Luebering Glycolytic Shunt                                       | 0.007586 | <i>PGAM1, TIGAR</i>                                                                                 |
| Superpathway of Geranylgeranyldiphosphate Biosynthesis I (via Mevalonate) | 0.007762 | <i>ACAT2, FNTB, IDI1</i>                                                                            |
| Noradrenaline and Adrenaline Degradation                                  | 0.008511 | <i>ADH6, ADHFE1, ALDH2, ALDH4A1</i>                                                                 |
| HIF1 $\alpha$ Signaling                                                   | 0.008511 | <i>CCNG2, FOXP3, GPI, LDHB, LDHC, MAP2K6, MMP15, MMP25, MRAS, PGF, TF</i>                           |
| Oxidative Ethanol Degradation III                                         | 0.00912  | <i>ACSS2, ALDH2, ALDH4A1</i>                                                                        |
| Atherosclerosis Signaling                                                 | 0.00955  | <i>CLU, COL1A1, COL1A2, COL5A3, IL1B, ORM1, PLA2G5, VCAM1</i>                                       |
| Glycogen Biosynthesis II (from UDP-D-Glucose)                             | 0.010471 | <i>EPM2A, GYS2</i>                                                                                  |
| Glutathione Redox Reactions I                                             | 0.017378 | <i>GSTA1, Gstt1, MGST1</i>                                                                          |
| Triacylglycerol Biosynthesis                                              | 0.018621 | <i>AGPAT2, DGAT2, GPAM, LPCAT2</i>                                                                  |
| Serotonin Degradation                                                     | 0.019498 | <i>ADH6, ADHFE1, ALDH2, ALDH4A1, Sult1a1</i>                                                        |
| Acute Phase Response Signaling                                            | 0.025119 | <i>CRABP2, HMOX2, IL1B, MAP2K6, MRAS, ORM1, SERPINF1, SOD2, TF</i>                                  |
| Ketogenesis                                                               | 0.025704 | <i>ACAT2, BDH1</i>                                                                                  |

|                                                            |          |                                                                                                 |
|------------------------------------------------------------|----------|-------------------------------------------------------------------------------------------------|
| FXR/RXR Activation                                         | 0.027542 | <i>CLU, FASN, IL1B, ORM1, SERPINF1, TF, VLDLR</i>                                               |
| Dendritic Cell Maturation                                  | 0.028184 | <i>CD1A, COL1A1, COL1A2, COL5A3, HLA-DMB, IL1B, IL23A, IRF8, LEP</i>                            |
| 3-phosphoinositide Degradation                             | 0.029512 | <i>CDC25A, DUSP10, EPHX2, HACD2, INPP5K, PDXP, PPIP5K1, SIRPA</i>                               |
| Dopamine Degradation                                       | 0.031623 | <i>ALDH2, ALDH4A1, Sult1a1</i>                                                                  |
| Toll-like Receptor Signaling                               | 0.031623 | <i>IL1B, MAP2K6, TLR8, TRAF4, UBC</i>                                                           |
| Oleate Biosynthesis II (Animals)                           | 0.035481 | <i>CYB5A, SCD</i>                                                                               |
| Mevalonate Pathway I                                       | 0.040738 | <i>ACAT2, IDI1</i>                                                                              |
| Estrogen Receptor Signaling                                | 0.043652 | <i>EIF2B2, ESR1, GPER1, LEP, MMP15, MMP25, MRAS, MT-ATP6, MT-CYB, PGF, SDHC, SOD2, UQCRRFS1</i> |
| TR/RXR Activation                                          | 0.045709 | <i>FASN, ME1, PCK1, THRB, THRSP</i>                                                             |
| D-myo-inositol (1, 4, 5, 6)-Tetrakisphosphate Biosynthesis | 0.047863 | <i>CDC25A, DUSP10, EPHX2, HACD2, PDXP, PPIP5K1, SIRPA</i>                                       |
| D-myo-inositol (3, 4, 5, 6)-tetrakisphosphate Biosynthesis | 0.047863 | <i>CDC25A, DUSP10, EPHX2, HACD2, PDXP, PPIP5K1, SIRPA</i>                                       |
| Xenobiotic Metabolism General Signaling Pathway            | 0.048978 | <i>GSTA1, GSTA4, GSTM4, MAP2K6, MGST1, MRAS, NQO1</i>                                           |

**Supplementary Table 5:** Genes identified as down-regulated in visceral adipose of heifer calves offered a High plane of nutrition compared to a Moderate plane of nutrition for the first 21 weeks of life and mapped in Ingenuity Pathway Analysis (IPA).

| Pathway name                                                                   | adj. p-value | Genes                                                                                                                           |
|--------------------------------------------------------------------------------|--------------|---------------------------------------------------------------------------------------------------------------------------------|
| STAT3 Pathway                                                                  | 3.63E-06     | <i>CISH, FGFR3, IGF1, IL20RA, IL6R, INSR, MYC, RASD1, SOCS1, SOCS2, SRC, VEGFA</i>                                              |
| 14-3-3-mediated Signaling                                                      | 1.17E-05     | <i>AKT1, MAPT, PLCD1, PLCH2, RASD1, SRC, TUBA1B, TUBB, TUBB4B, TUBB6, VIM</i>                                                   |
| Gap Junction Signaling                                                         | 0.000631     | <i>AKT1, GRIK2, NPR1, PLCD1, PLCH2, RASD1, SRC, TUBA1B, TUBB, TUBB4B, TUBB6</i>                                                 |
| Angiopoietin Signaling                                                         | 0.001778     | <i>AKT1, ANGPT2, GRB7, NCK1, NFKBIA, RASD1</i>                                                                                  |
| Axonal Guidance Signaling                                                      | 0.002239     | <i>ADAM11, AKT1, ERBB2, IGF1, KALRN, KIF7, NCK1, NTN5, PLCD1, PLCH2, RASD1, RGS3, ROBO2, TUBA1B, TUBB, TUBB4B, TUBB6, VEGFA</i> |
| JAK/Stat Signaling                                                             | 0.002455     | <i>AKT1, CISH, RASD1, SOCS1, SOCS2, STAT6</i>                                                                                   |
| Role of JAK2 in Hormone-like Cytokine Signaling                                | 0.00257      | <i>IRS2, SH2B2, SOCS1, SOCS2</i>                                                                                                |
| Serine Biosynthesis                                                            | 0.002818     | <i>DUSP26, PSPH</i>                                                                                                             |
| Citrulline-Nitric Oxide Cycle                                                  | 0.002818     | <i>ASL, ASS1</i>                                                                                                                |
| Protein Kinase A Signaling                                                     | 0.003802     | <i>AKAP4, DUSP22, DUSP26, DUSP4, NFKBIA, PHKA2, PLCD1, PLCH2, PTGS2, PTPRD, PTPRS, RYR1, TNNI2, TNS2, TTN</i>                   |
| Acute Phase Response Signaling                                                 | 0.00389      | <i>AKT1, C2, IL6R, ITIH3, ITIH4, NFKBIA, RASD1, SOCS1, SOCS2</i>                                                                |
| Arginine Biosynthesis IV                                                       | 0.004169     | <i>ASL, ASS1</i>                                                                                                                |
| Urea Cycle                                                                     | 0.004169     | <i>ASL, ASS1</i>                                                                                                                |
| Phospholipases                                                                 | 0.005012     | <i>LCAT, PLA1A, PLCD1, PLCH2, PLD5</i>                                                                                          |
| Superpathway of Serine and Glycine Biosynthesis I                              | 0.005754     | <i>DUSP26, PSPH</i>                                                                                                             |
| IL-6 Signaling                                                                 | 0.006026     | <i>AKT1, IL6R, NFKBIA, RASD1, SOCS1, TNFAIP6, VEGFA</i>                                                                         |
| Remodeling of Epithelial Adherens Junctions                                    | 0.006166     | <i>SRC, TUBA1B, TUBB, TUBB4B, TUBB6</i>                                                                                         |
| IL-23 Signaling Pathway                                                        | 0.006607     | <i>AKT1, HIF1A, NFKBIA, RORC</i>                                                                                                |
| p70S6K Signaling                                                               | 0.006761     | <i>AKT1, EEF2K, MAPT, PLCD1, PLCH2, RASD1, SRC</i>                                                                              |
| IL-8 Signaling                                                                 | 0.007586     | <i>AKT1, ANGPT2, CCND2, PLD5, PTGS2, RASD1, RHOB, SRC, VEGFA</i>                                                                |
| ERK5 Signaling                                                                 | 0.007762     | <i>AKT1, MYC, RASD1, SGK1, SRC</i>                                                                                              |
| Role of Macrophages, Fibroblasts and Endothelial Cells in Rheumatoid Arthritis | 0.007943     | <i>AKT1, DKK3, IL6R, MYC, NFKBIA, PLCD1, PLCH2, RASD1, SOCS1, SRC, TRAF3IP2, VEGFA</i>                                          |
| Estrogen-Dependent Breast Cancer Signaling                                     | 0.00871      | <i>AKT1, HSD17B11, IGF1, RASD1, SRC</i>                                                                                         |
| HIF1 $\alpha$ Signaling                                                        | 0.008913     | <i>AKT1, CAMK1G, HIF1A, IGF1, IL6R, RASD1, RORC, VEGFA, VIM</i>                                                                 |
| IGF-1 Signaling                                                                | 0.008913     | <i>AKT1, IGF1, IRS2, RASD1, SOCS1, SOCS2</i>                                                                                    |
| Neuregulin Signaling                                                           | 0.009333     | <i>AKT1, ERBB2, GRB7, MYC, RASD1, SRC</i>                                                                                       |

|                                                                               |          |                                                                       |
|-------------------------------------------------------------------------------|----------|-----------------------------------------------------------------------|
| PI3K Signaling in B Lymphocytes                                               | 0.00955  | <i>AKT1, IRS2, MALT1, NFKBIA, PLCD1, PLCH2, RASD1</i>                 |
| Erythropoietin Signaling                                                      | 0.01     | <i>AKT1, CCND2, CLCF1, HIF1A, IRS2, NFKBIA, RASD1, SRC</i>            |
| mTOR Signaling                                                                | 0.010233 | <i>AKT1, DDIT4, HIF1A, INSR, PLD5, PRR5L, RASD1, RHOB, VEGFA</i>      |
| Opioid Signaling Pathway                                                      | 0.010233 | <i>AKT1, CAMK1G, MYC, NFKBIA, OPRL1, RASD1, RGS1, RGS3, RYR1, SRC</i> |
| Integrin Signaling                                                            | 0.01122  | <i>AKT1, GRB7, GSN, NCK1, RASD1, RHOB, SRC, TSPAN4, TTN</i>           |
| BEX2 Signaling Pathway                                                        | 0.011482 | <i>AKT1, ERBB2, HIF1A, NFKBIA, VEGFA</i>                              |
| Epithelial Adherens Junction Signaling                                        | 0.015849 | <i>AKT1, RASD1, SRC, TUBA1B, TUBB, TUBB4B, TUBB6</i>                  |
| Endothelin-1 Signaling                                                        | 0.015849 | <i>LCAT, MYC, PLCD1, PLCH2, PLD5, PTGS2, RASD1, SRC</i>               |
| GP6 Signaling Pathway                                                         | 0.016596 | <i>AKT1, COL11A2, COL20A1, COL22A1, LAMB1, RASGRP2</i>                |
| ILK Signaling                                                                 | 0.016596 | <i>AKT1, HIF1A, IRS2, MYC, PTGS2, RHOB, VEGFA, VIM</i>                |
| IL-9 Signaling                                                                | 0.018197 | <i>CISH, IRS2, SOCS2</i>                                              |
| ErbB2-ErbB3 Signaling                                                         | 0.025119 | <i>AKT1, ERBB2, MYC, RASD1</i>                                        |
| Superpathway of Citrulline Metabolism                                         | 0.026303 | <i>ASL, ASS1</i>                                                      |
| VEGF Signaling                                                                | 0.027542 | <i>AKT1, HIF1A, RASD1, SRC, VEGFA</i>                                 |
| Adipogenesis pathway                                                          | 0.027542 | <i>AKT1, FGFR3, HIF1A, KLF5, PER2, TXNIP</i>                          |
| Role of JAK1 and JAK3 in $\gamma$ c Cytokine Signaling                        | 0.0302   | <i>IRS2, RASD1, SOCS1, STAT6</i>                                      |
| Agrin Interactions at Neuromuscular Junction                                  | 0.031623 | <i>ERBB2, LAMB1, RASD1, SRC</i>                                       |
| Growth Hormone Signaling                                                      | 0.033113 | <i>IGF1, IGFALS, SOCS1, SOCS2</i>                                     |
| Insulin Receptor Signaling                                                    | 0.033113 | <i>AKT1, INSR, IRS2, NCK1, RASD1, SGK1</i>                            |
| Pyrimidine Ribonucleotides Interconversion                                    | 0.034674 | <i>AK5, HNRNPA1, SMARCA1</i>                                          |
| Hypoxia Signaling in the Cardiovascular System                                | 0.038019 | <i>AKT1, HIF1A, NFKBIA, VEGFA</i>                                     |
| EIF2 Signaling                                                                | 0.038905 | <i>AKT1, HNRNPA1, INSR, MYC, RASD1, RPL3, RPLP0, VEGFA</i>            |
| Pyrimidine Ribonucleotides De Novo Biosynthesis                               | 0.038905 | <i>AK5, HNRNPA1, SMARCA1</i>                                          |
| IL-15 Signaling                                                               | 0.039811 | <i>AKT1, MYC, RASD1, STAT6</i>                                        |
| Regulation Of The Epithelial Mesenchymal Transition By Growth Factors Pathway | 0.042658 | <i>AKT1, ERBB2, FGFR3, IL6R, PARD6B, RASD1, VIM</i>                   |
| Phagosome Maturation                                                          | 0.045709 | <i>CTSO, DYNLRB2, TUBA1B, TUBB, TUBB4B, TUBB6</i>                     |
| Systemic Lupus Erythematosus In B Cell Signaling Pathway                      | 0.047863 | <i>AKT1, CCND2, CLCF1, IL6R, MALT1, MYC, RASD1, RASGRP2, SRC</i>      |
| IL-17 Signaling                                                               | 0.047863 | <i>AKT1, PTGS2, RASD1, TRAF3IP2</i>                                   |
